# Supplementary material for: Recognising Mineral Deposits from Cover; A Case Study Using Zircon Chemistry in the Gawler Craton, South Australia
Source: MDPI journal article supplement (doi:10.3390/min11090916), 2021-08-25

CAR058\_14\_zrn09b

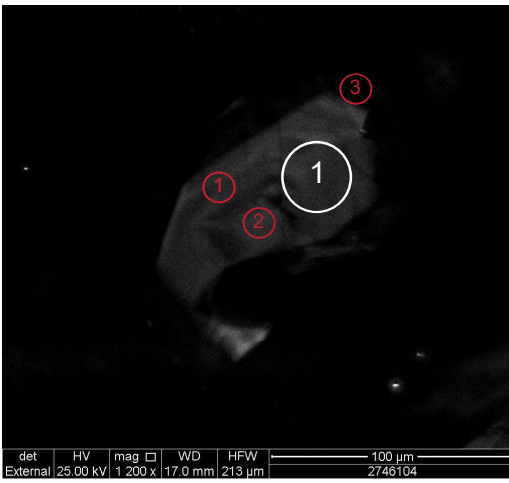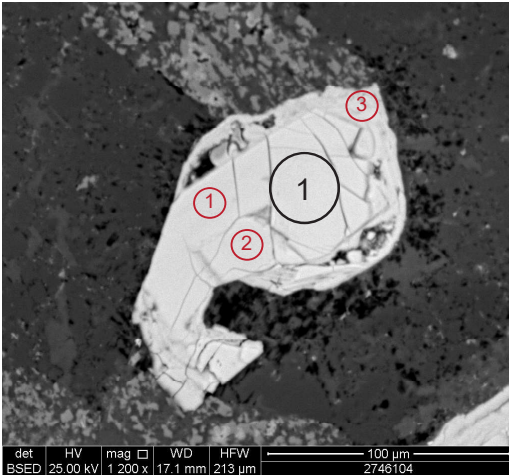

CAR058\_14\_zrn09c

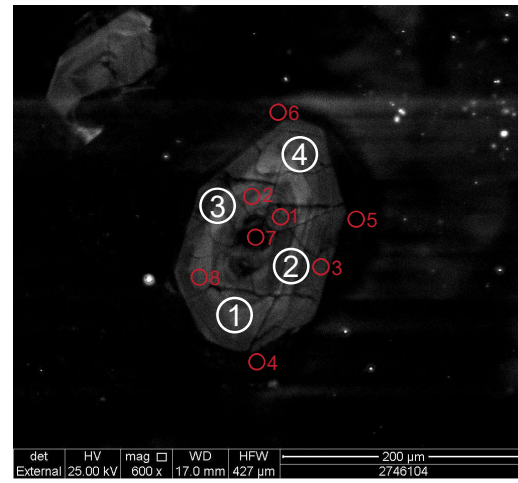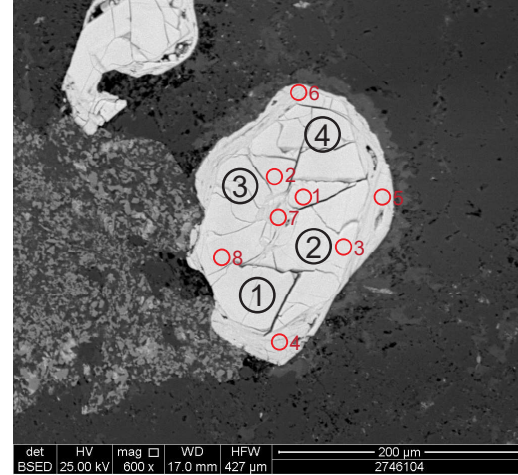

CAR058\_14\_zrn14

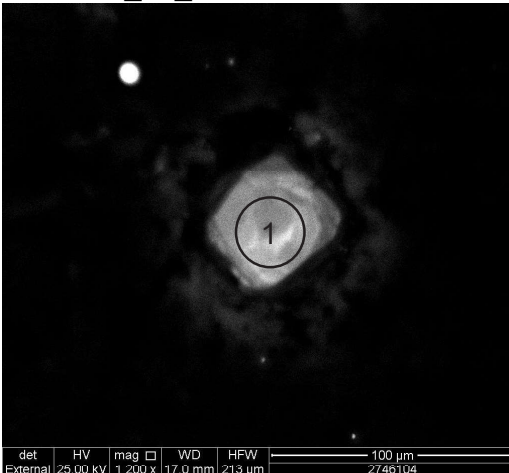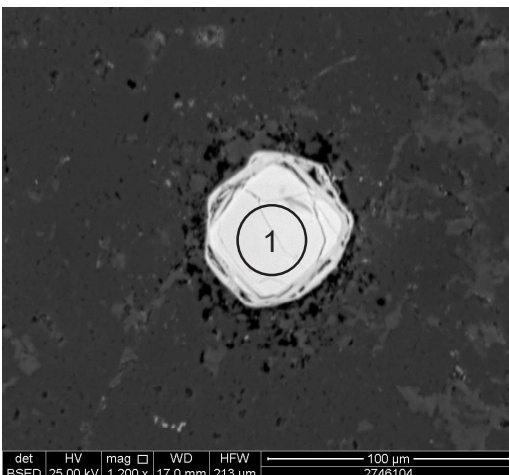

CAR058\_14\_zrn31

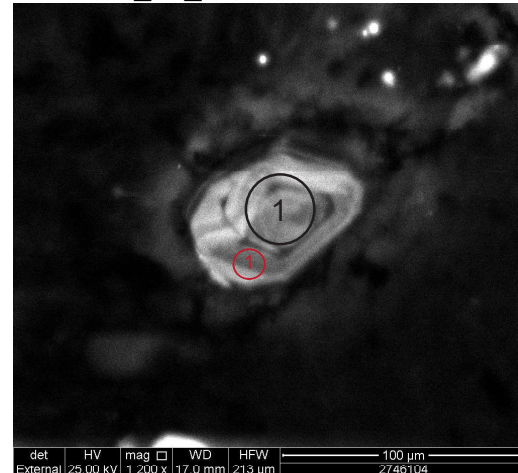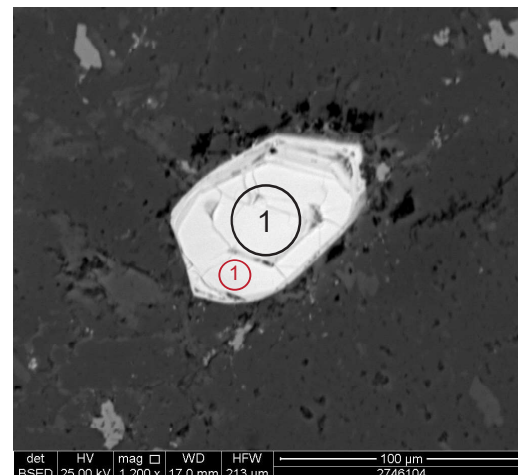

CAR058\_14\_zrn22

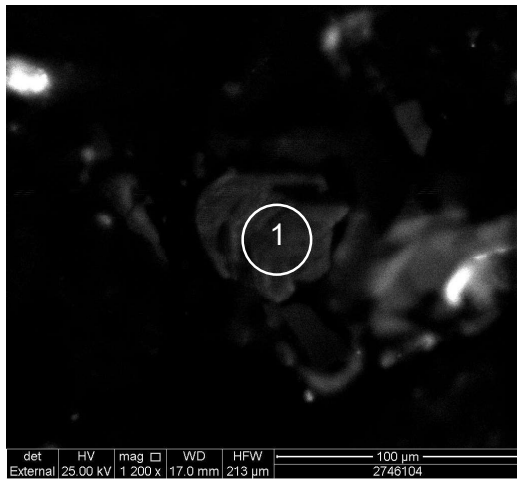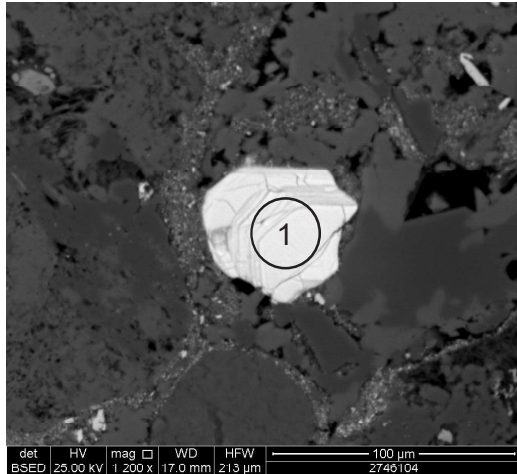

CAR058\_14\_zrn19

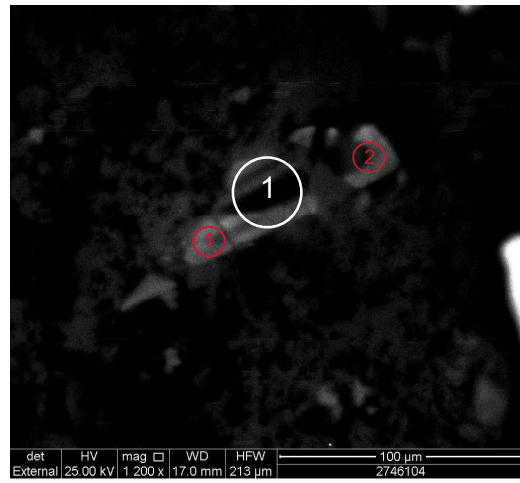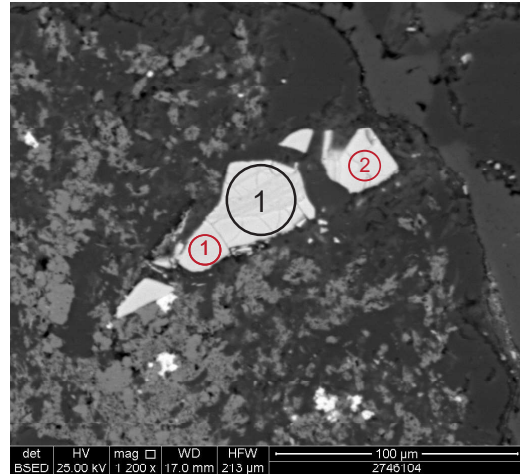

CAR058\_14\_zrn41

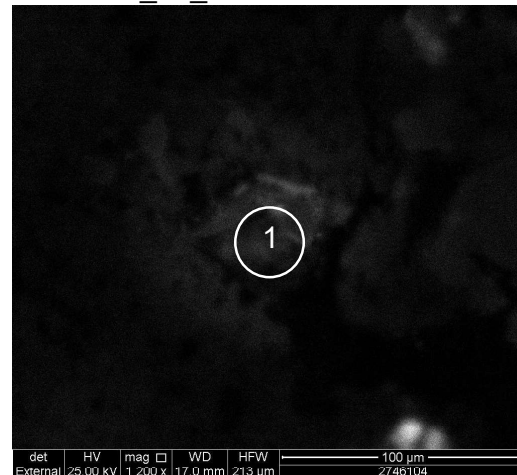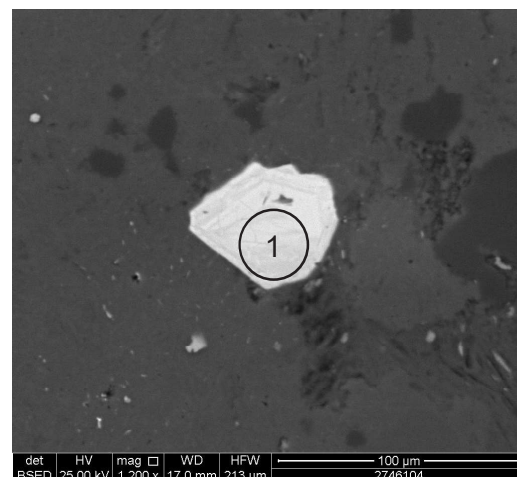

CAR058\_14\_zrn31

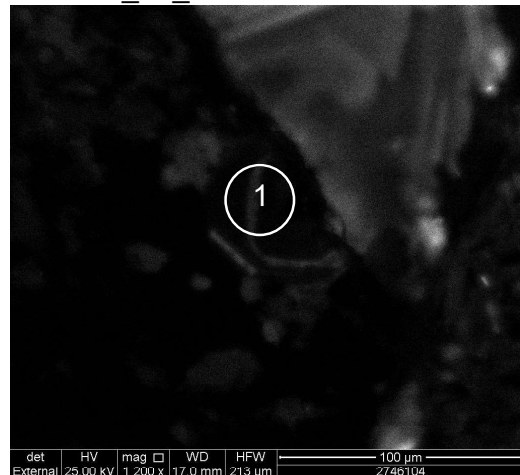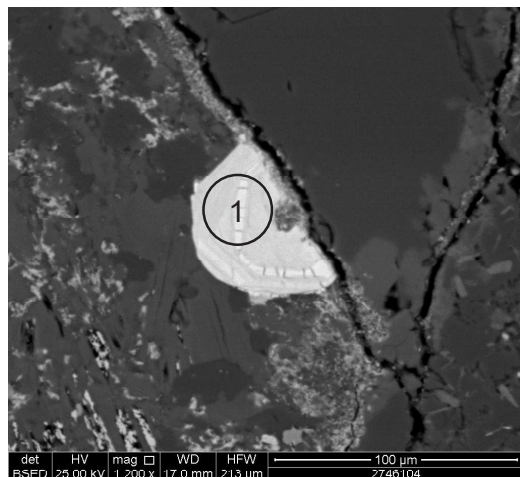



CAR058\_14\_zrn02

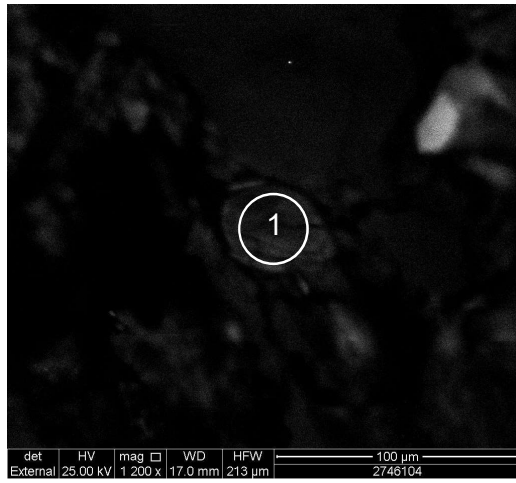

CAR058\_14\_zrn08

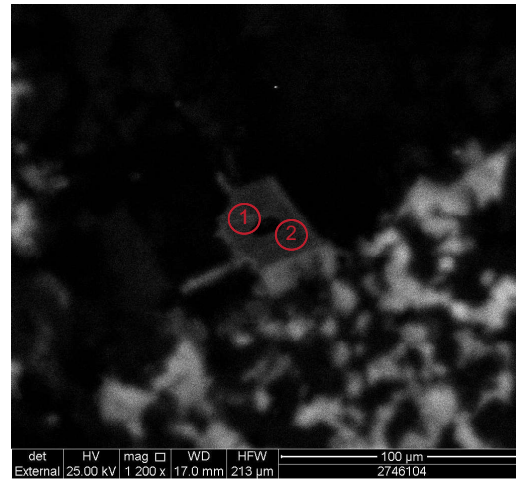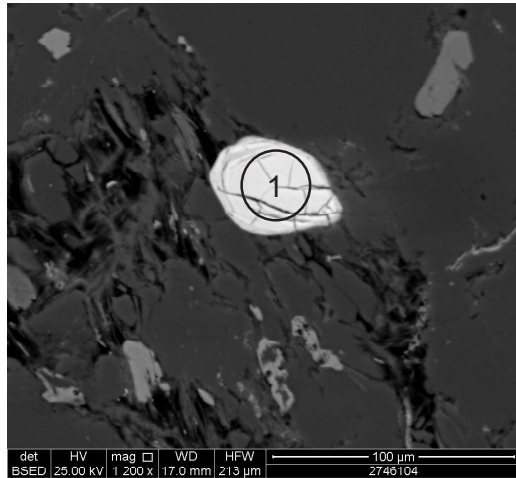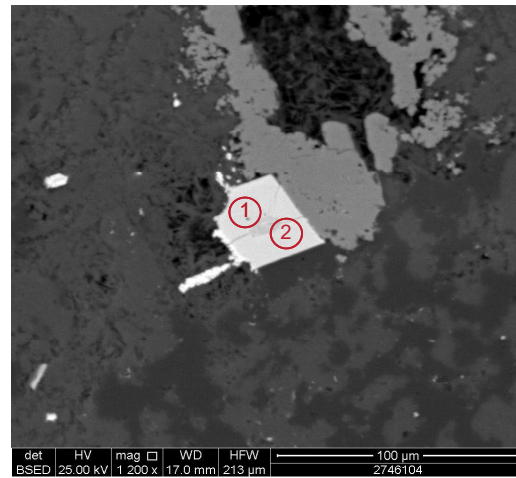

CAR058\_14\_zrn09d

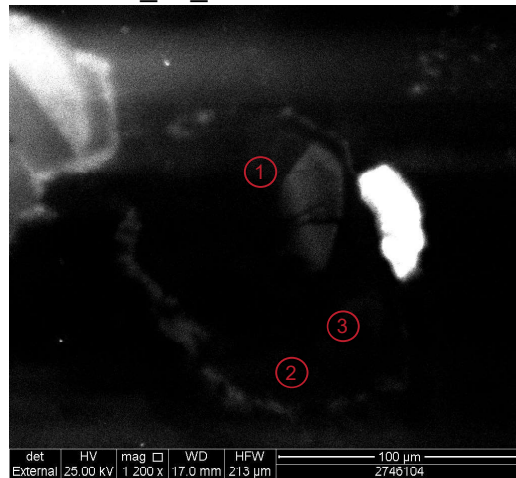

CAR058\_14\_zrn11a

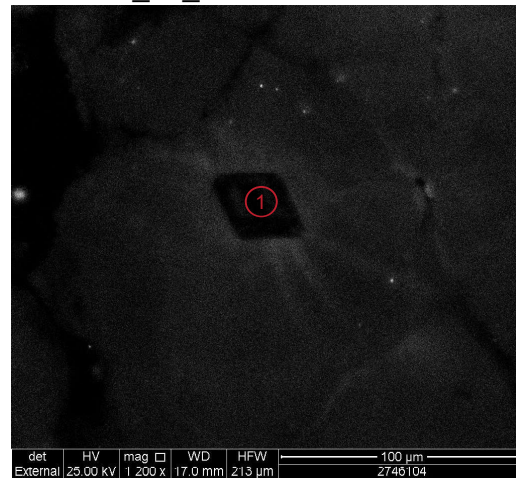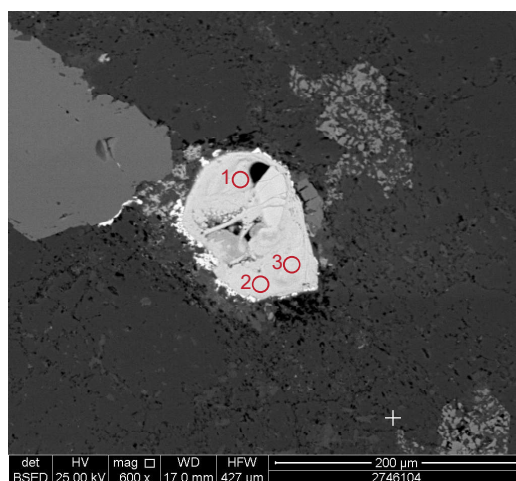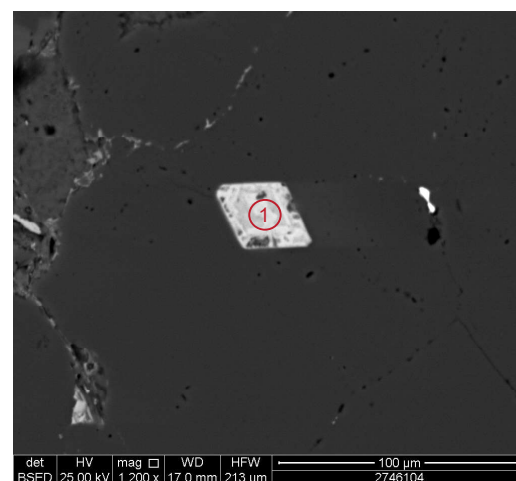

CAR058\_14\_zrn17

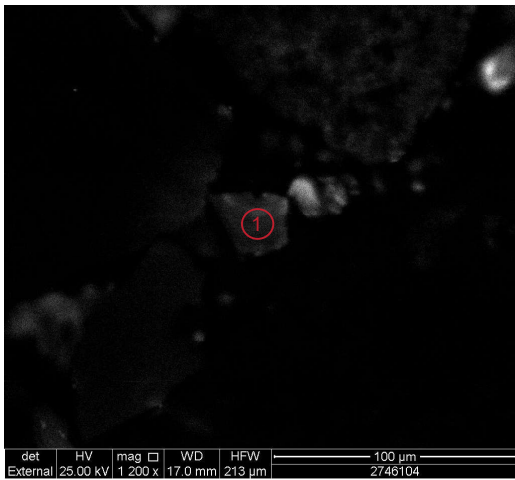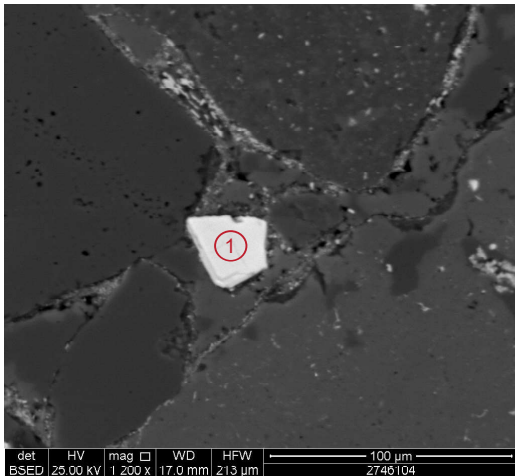

CAR058\_14\_zrn16

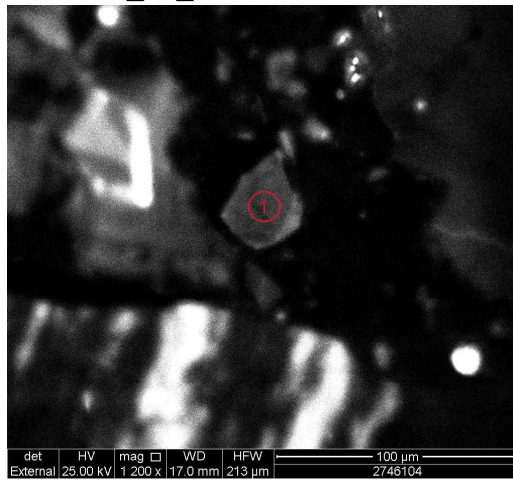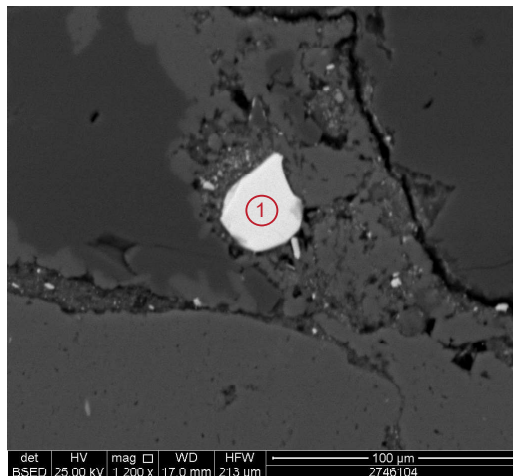

CAR058\_14\_zrn11b

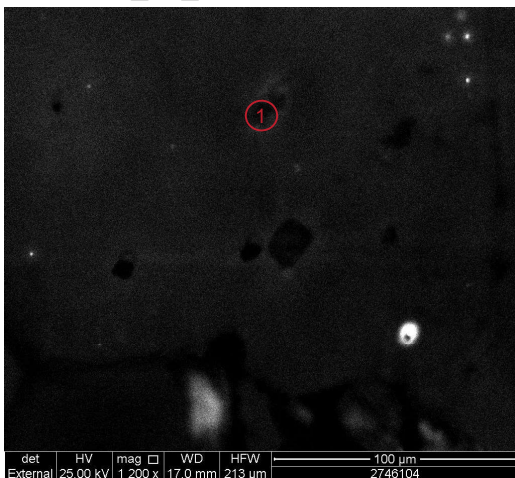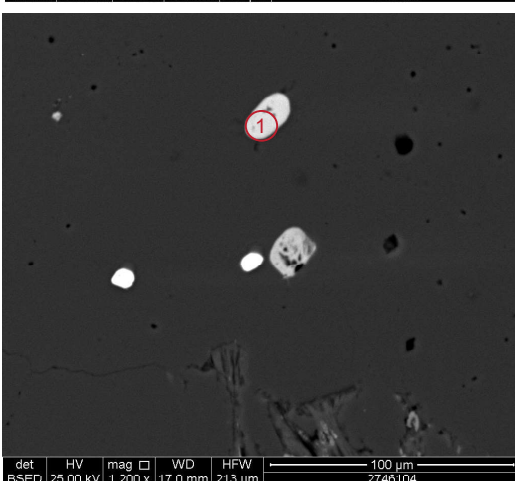

CAR058\_14\_zrn16

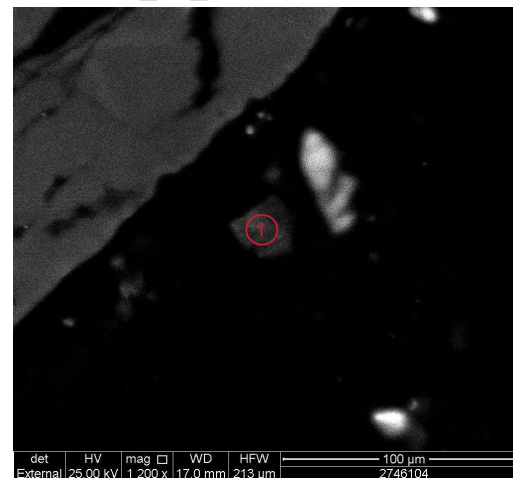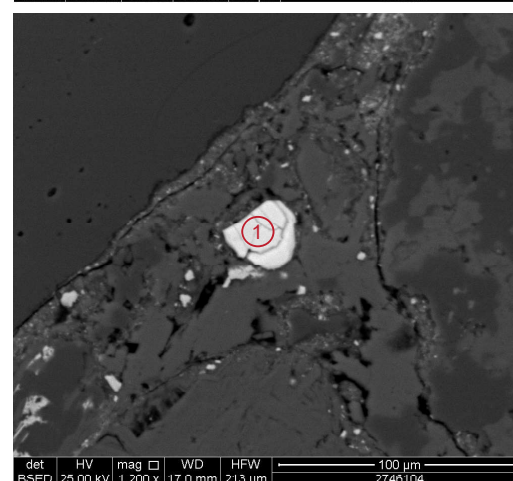



CAR058\_14\_zrn23

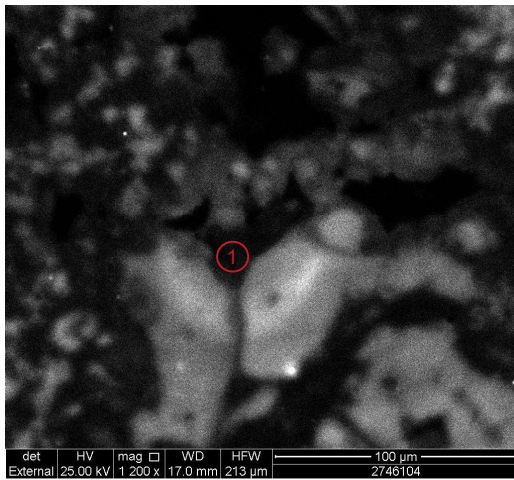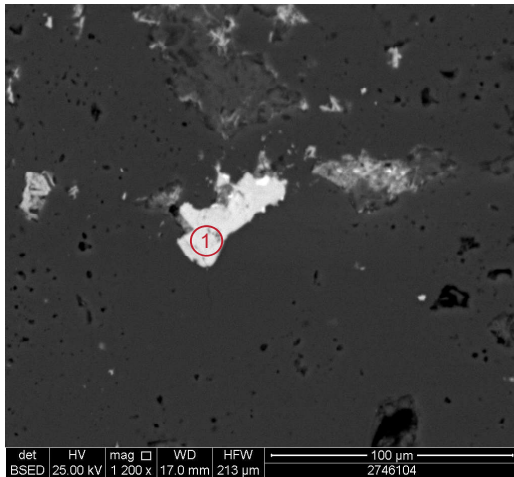

CAR058\_14\_zrn37

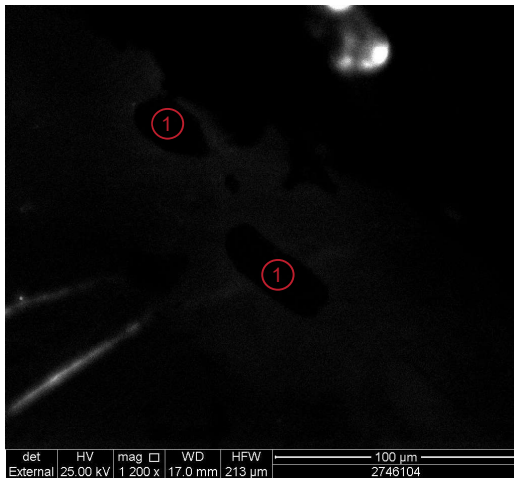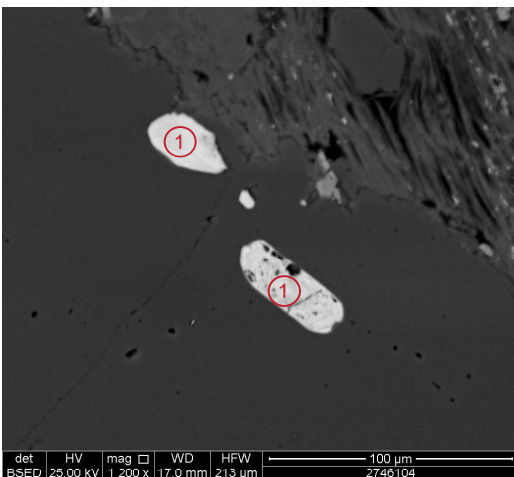

CAR058\_14\_zrn35

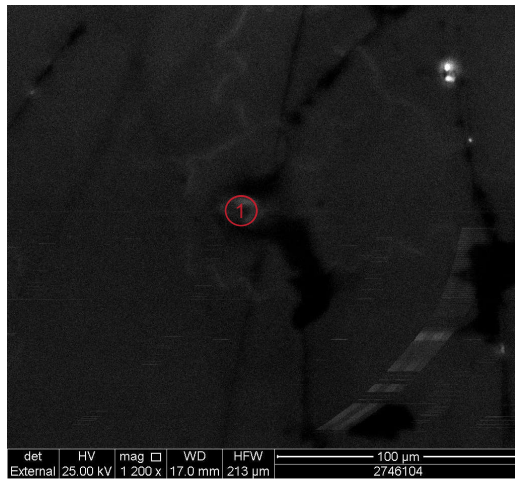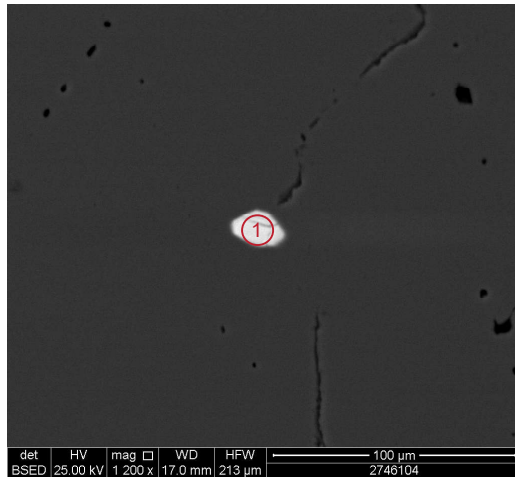

CAR042\_36\_zrn04

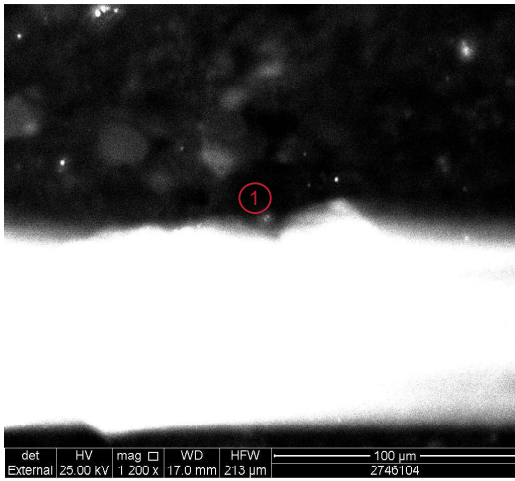

CAR042\_36\_zrn05

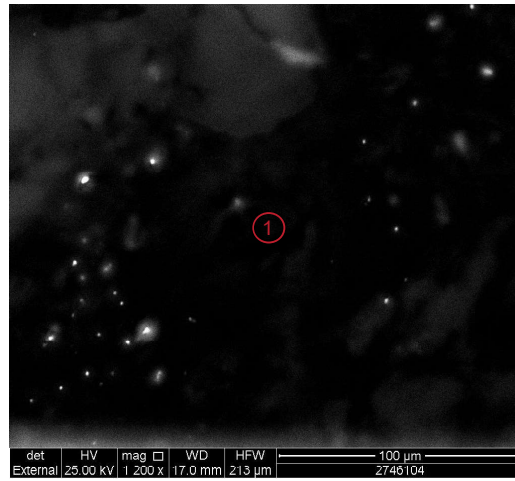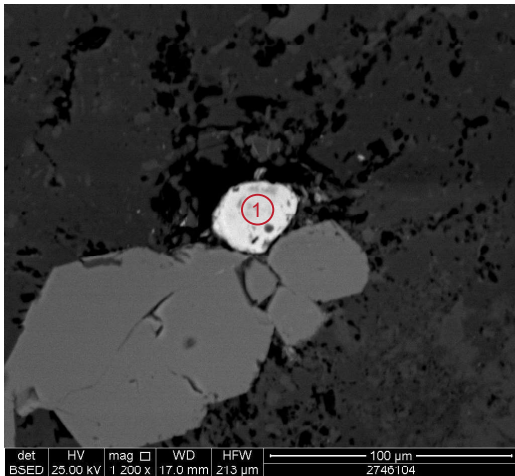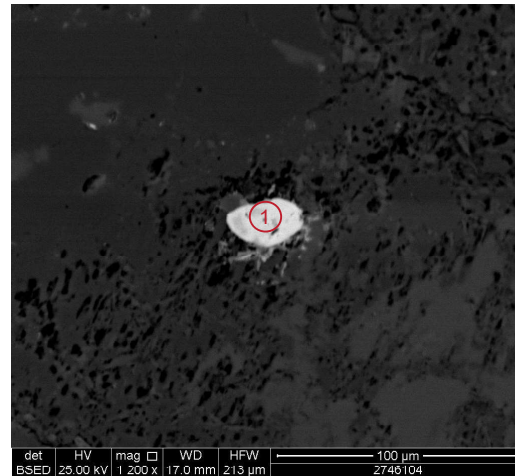

CAR042\_36\_zrn08

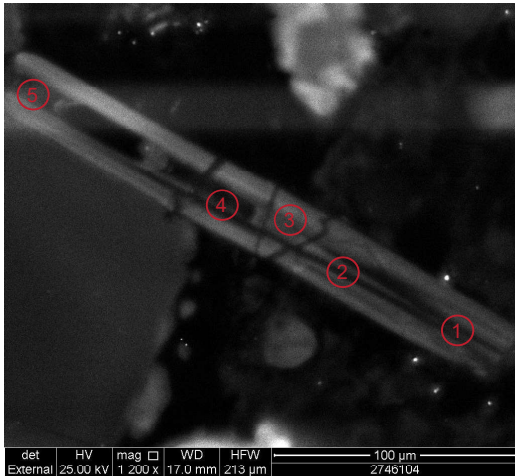

CAR042\_36\_zrn15

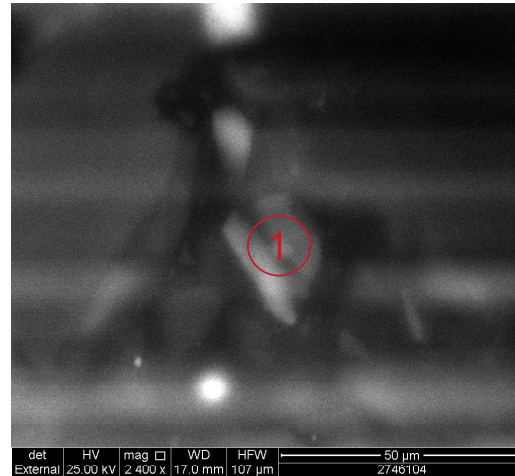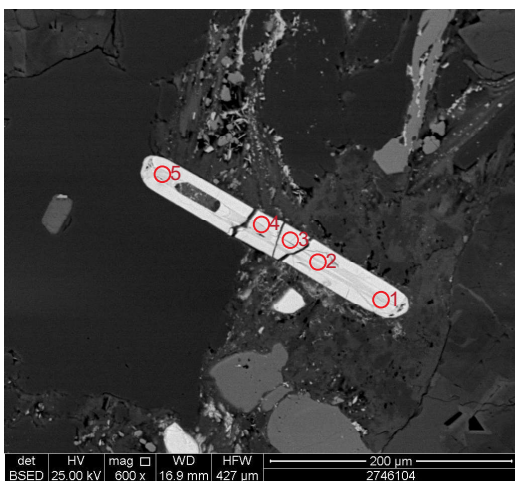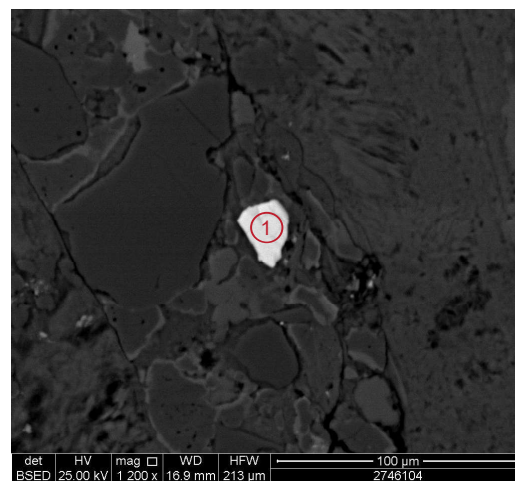



CAR042\_36\_zrn16

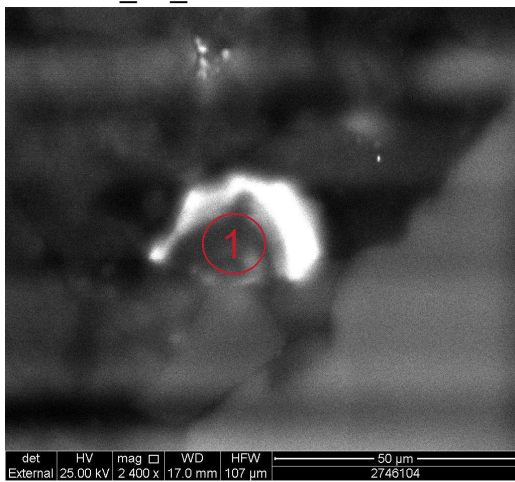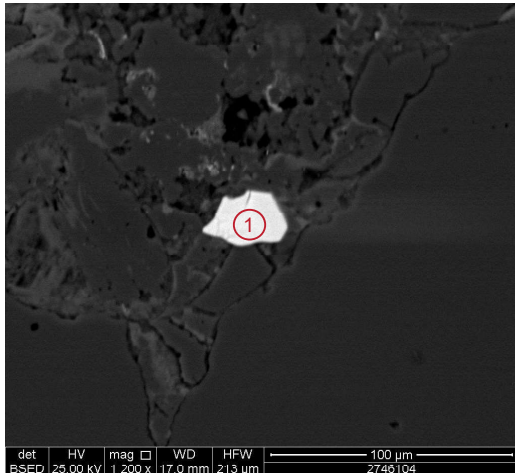

CAR042\_36\_zrn20

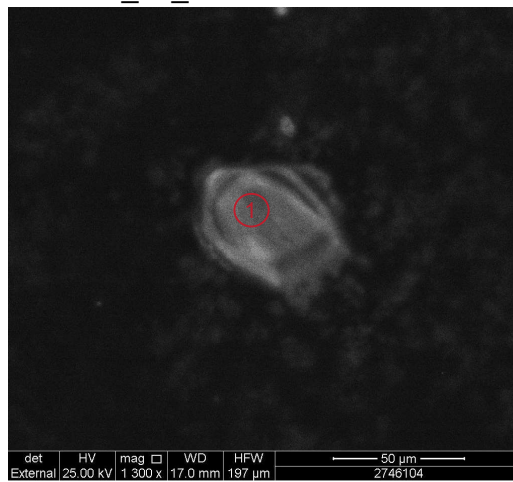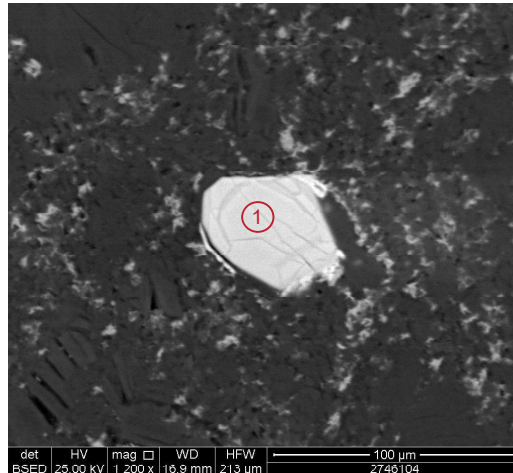

CAR042\_36\_zrn25

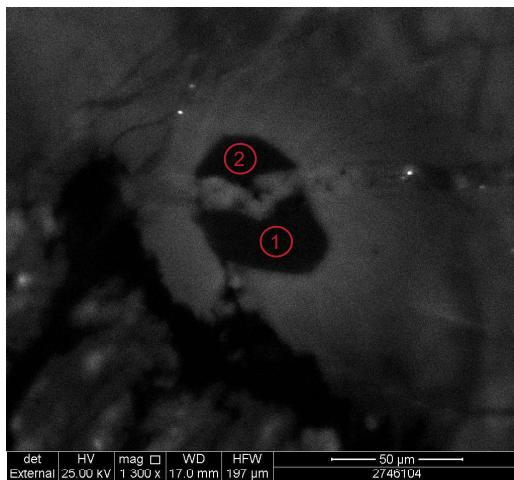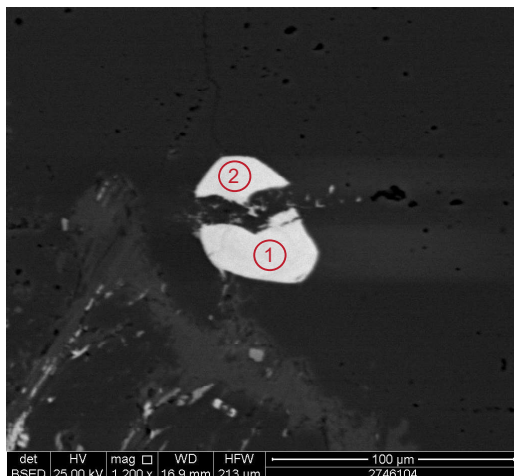

CAR042\_36\_zrn26

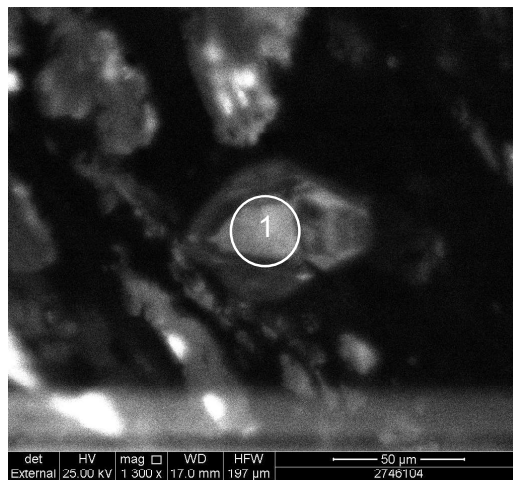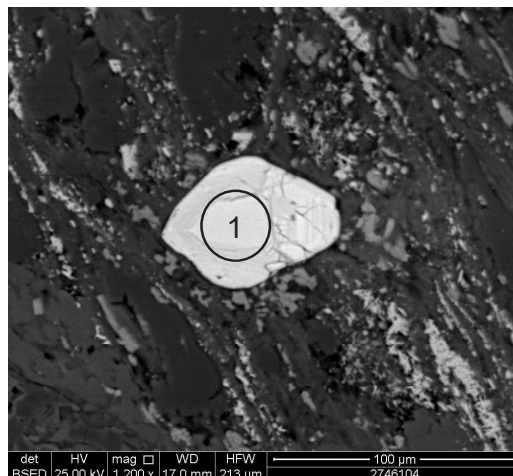



CAR042\_36\_zrn28

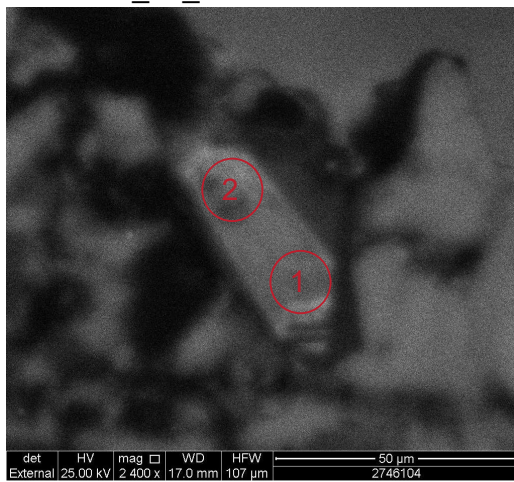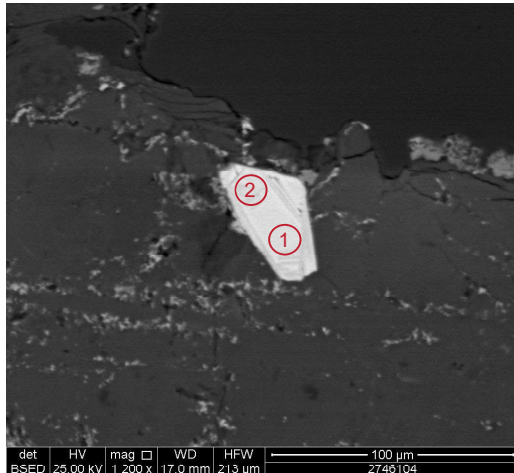

CAR042\_36\_zrn30

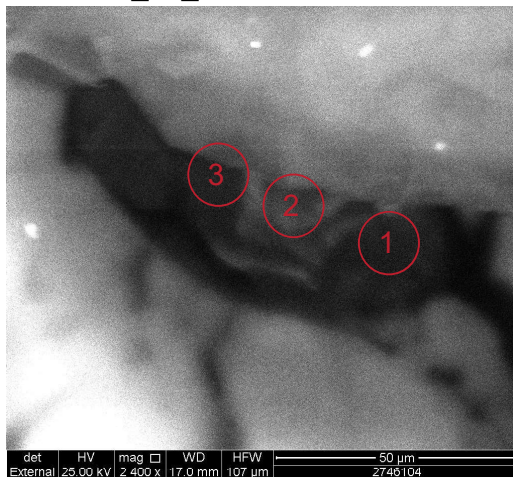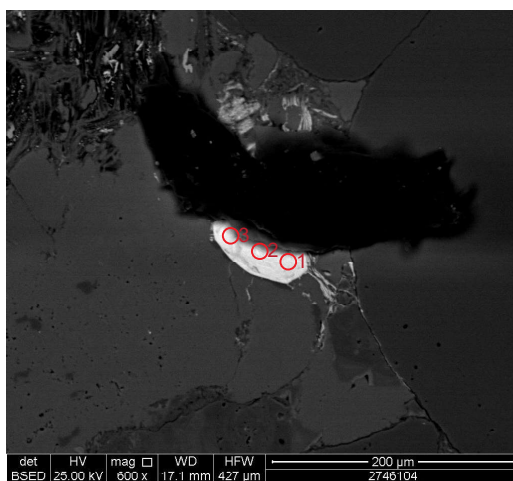

CAR042\_36\_zrn29

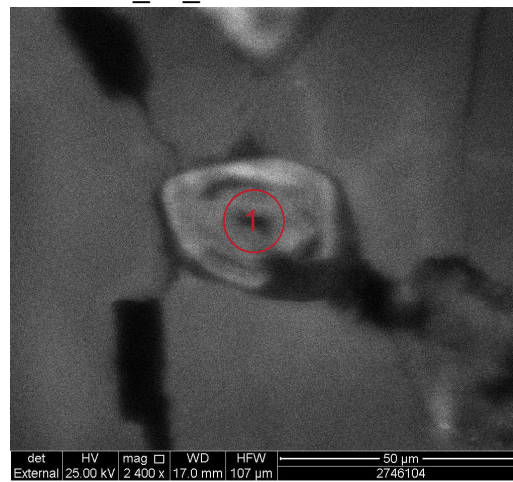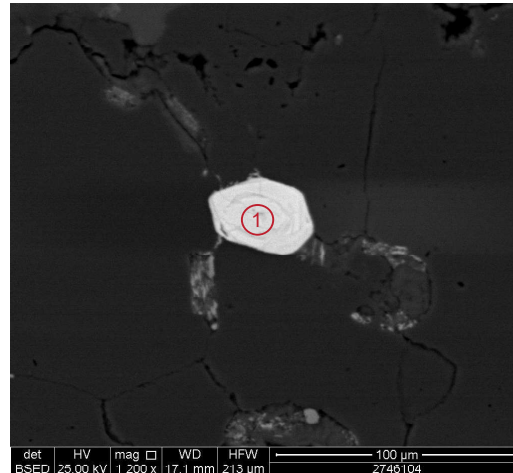

CAR042\_36\_zrn31

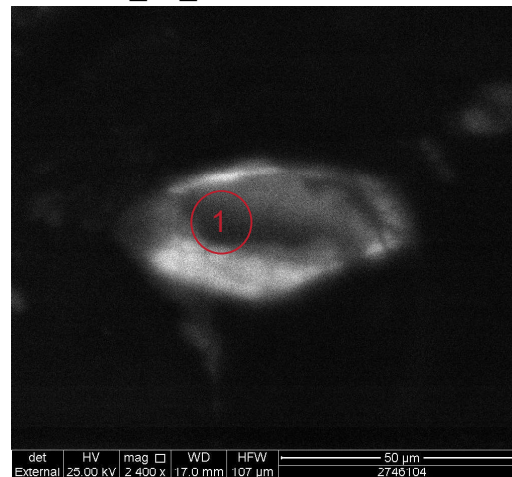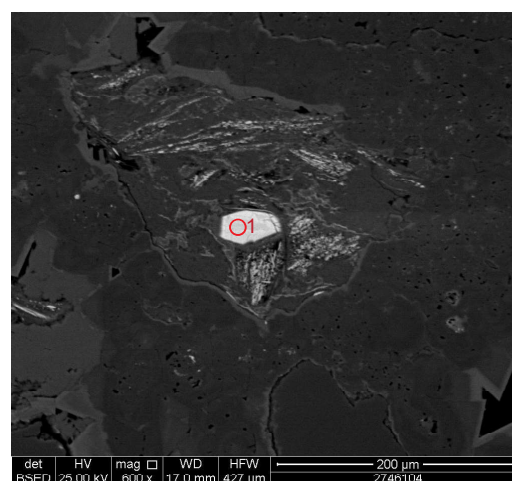



CAR042\_36\_zrn35

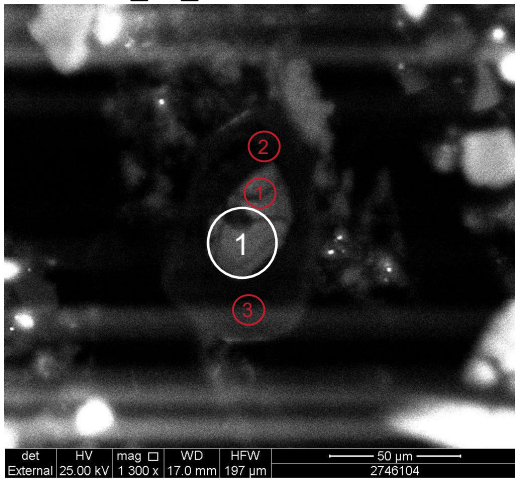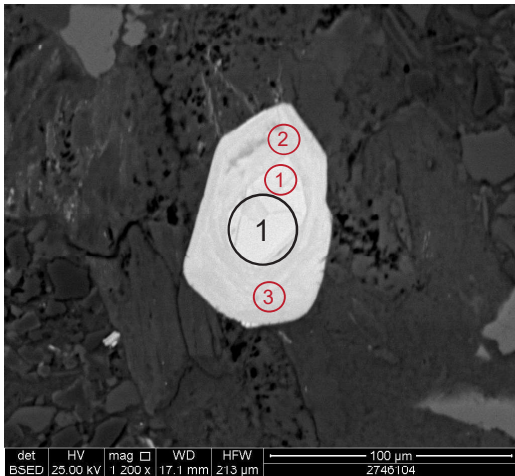

CAR042\_36\_zrn42

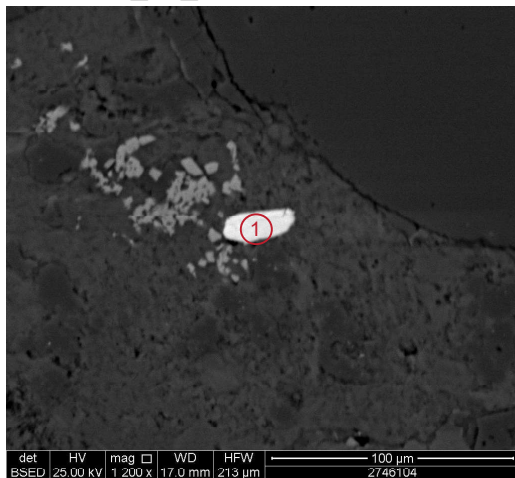

CAR042\_36\_zrn41

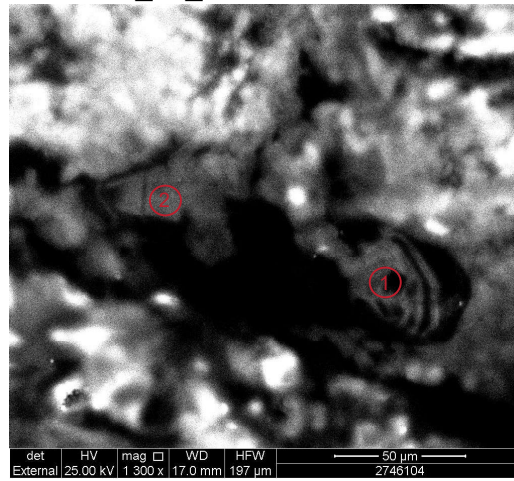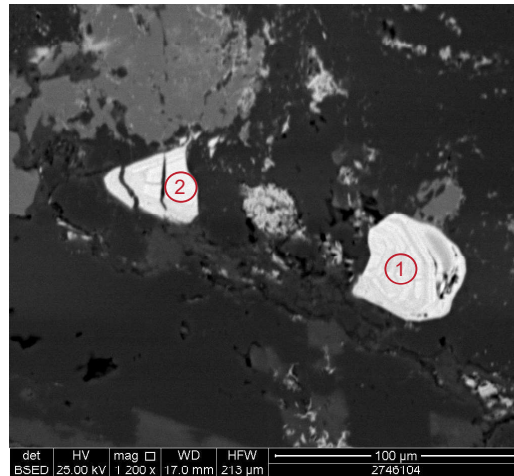

CAR042\_36\_zrn44

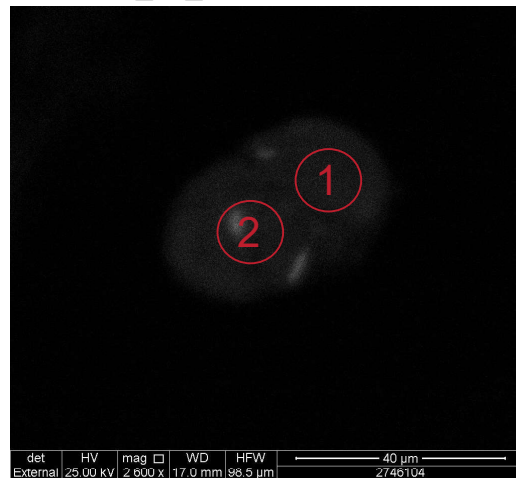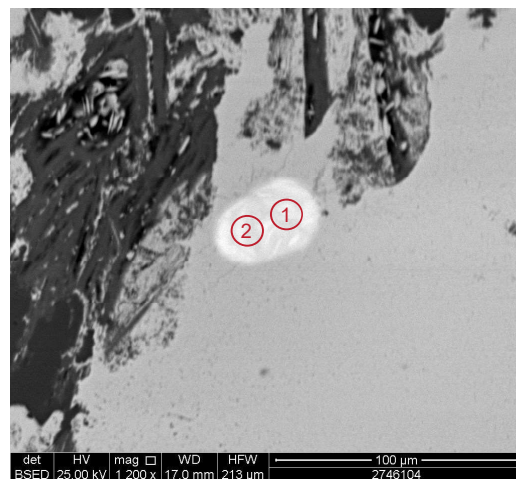

CAR042\_36\_zrn45

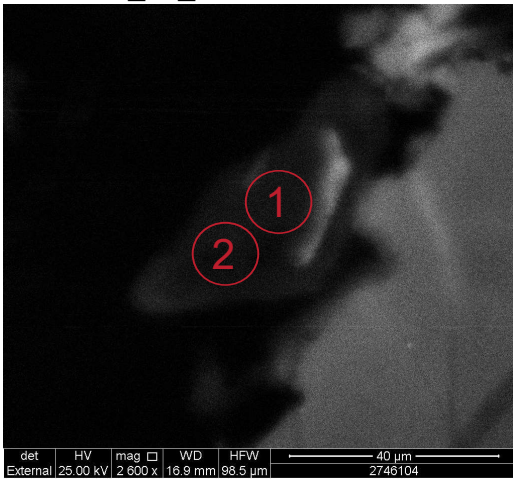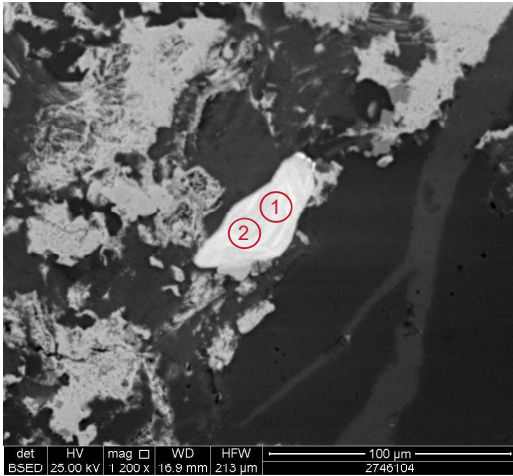



CAR010\_01\_zrn03a

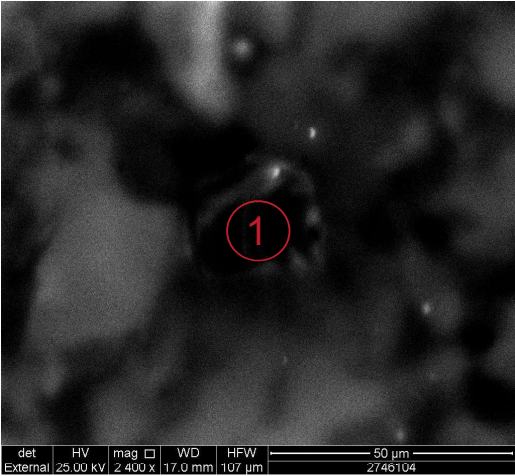

CAR010\_01\_zrn03b

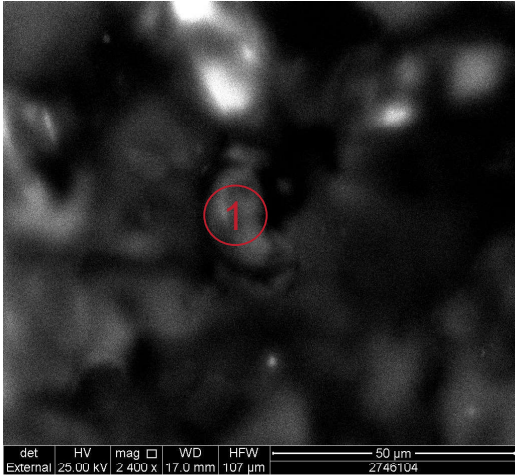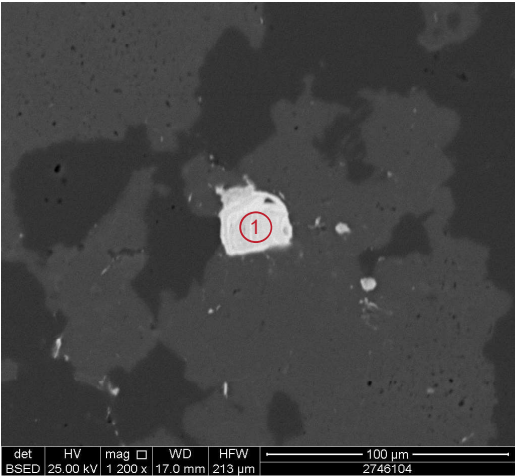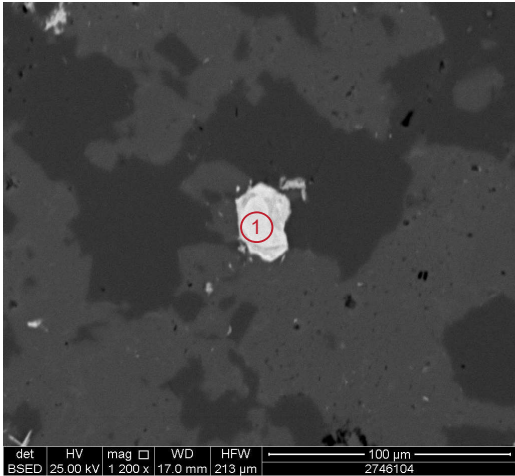

CAR010\_01\_zrn04

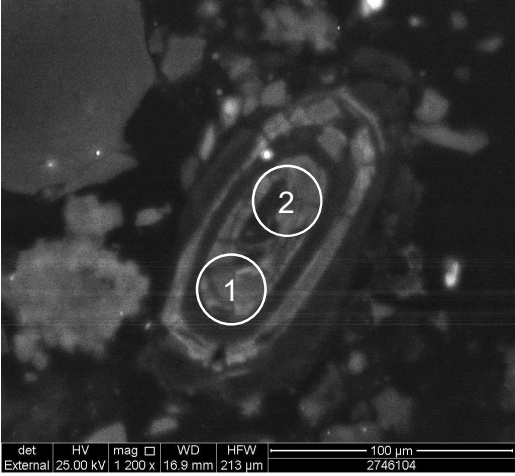

CAR010\_01\_zrn05

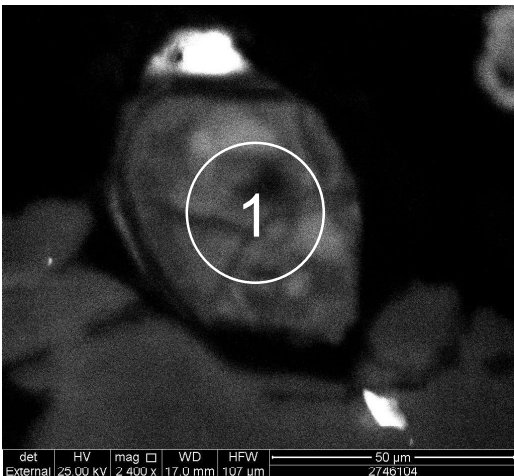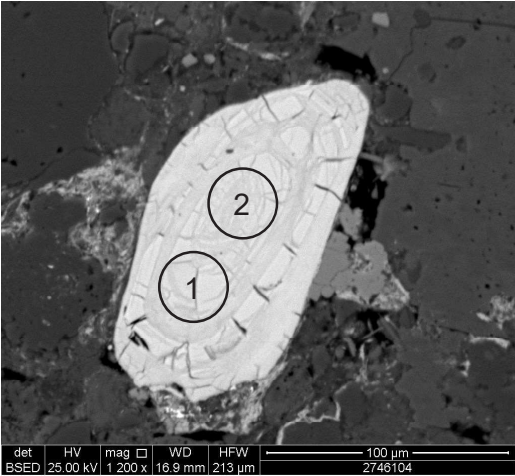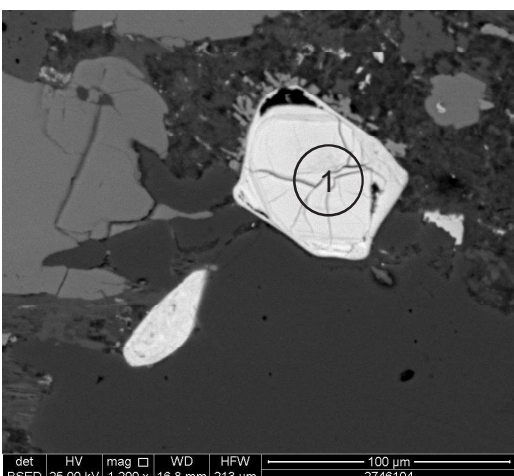

CAR010\_01\_zrn13

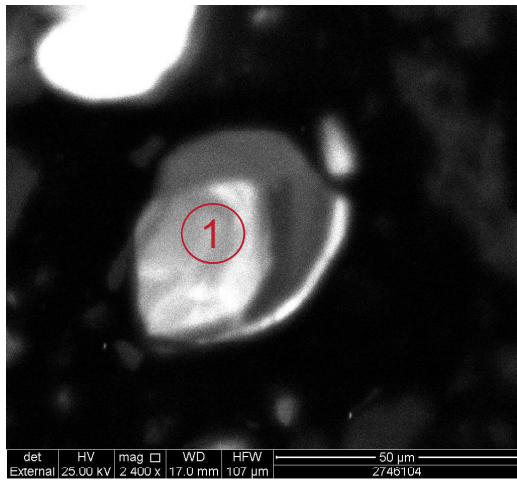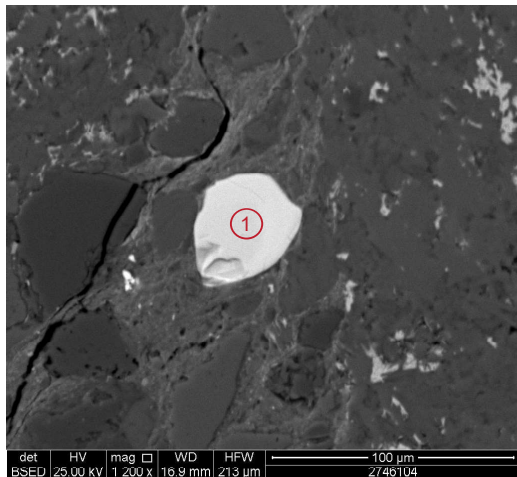

CAR010\_01\_zrn14

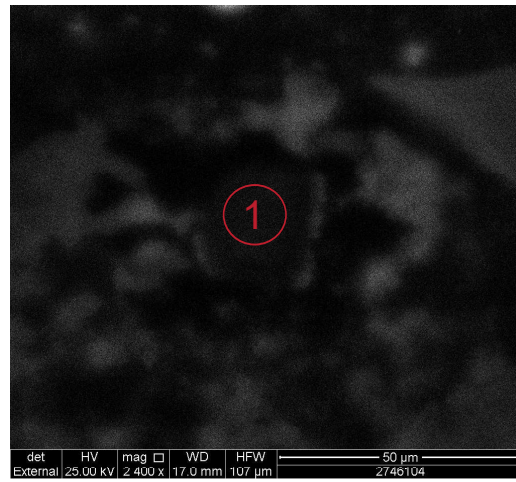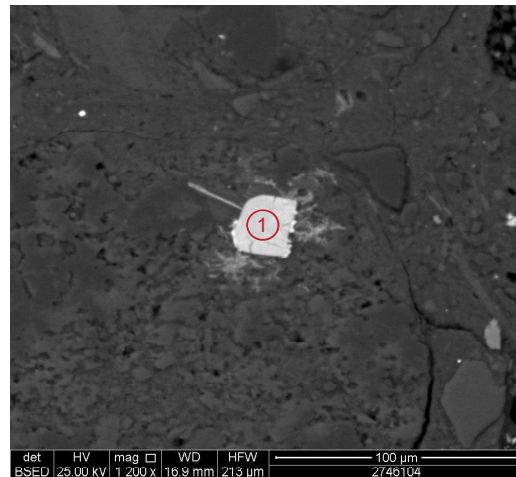

CAR010\_01\_zrn15

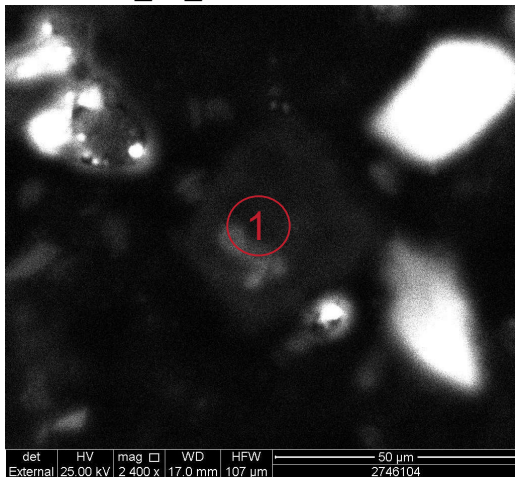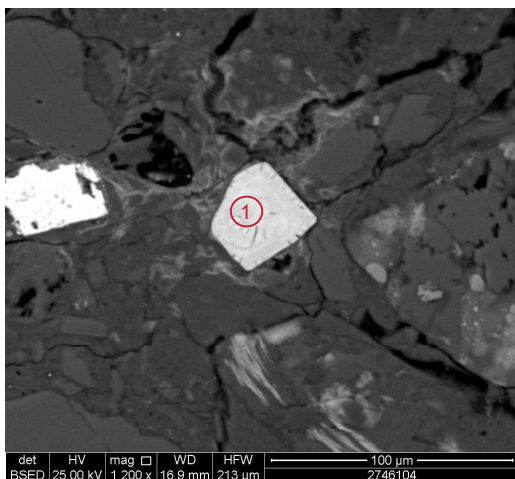

CAR010\_01\_zrn18

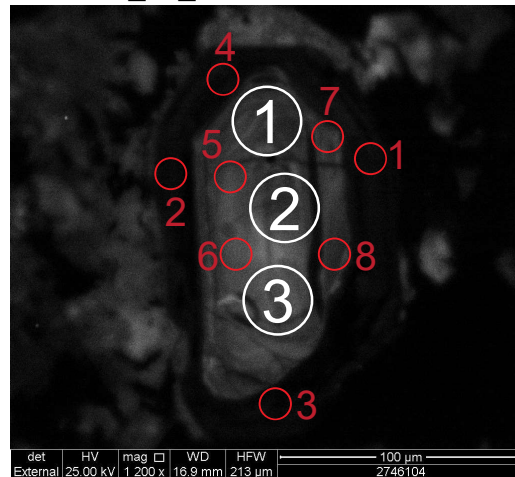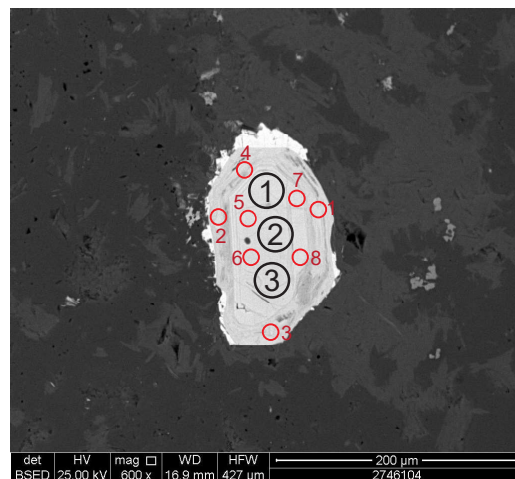



CAR010\_01\_zrn22

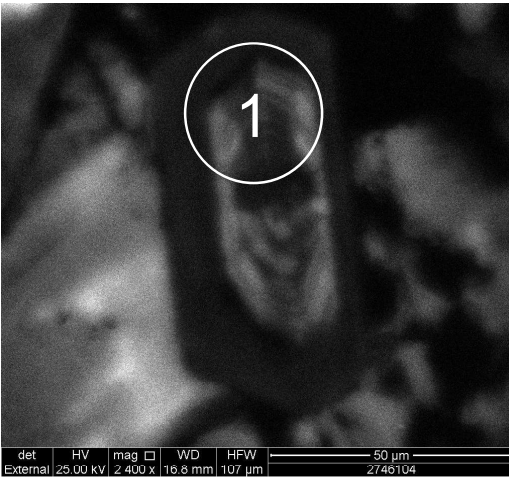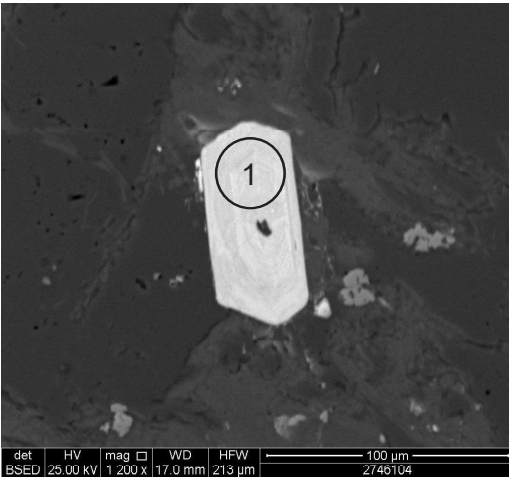

CAR010\_01\_zrn24

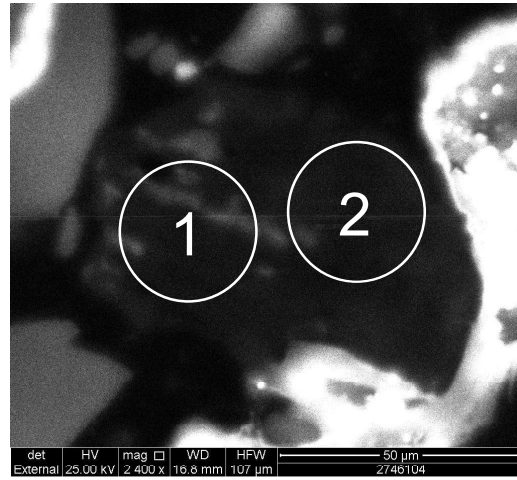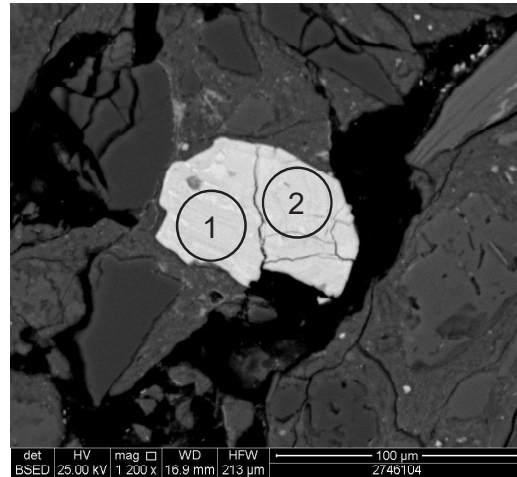

CAR010\_01\_zrn25

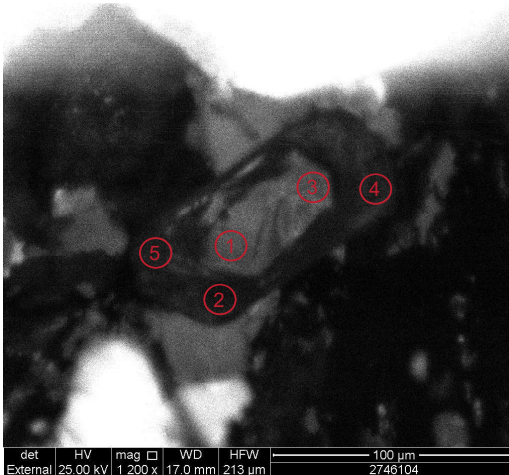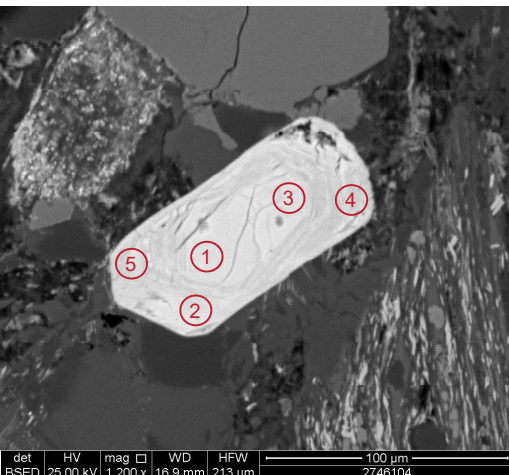

CAR010\_01\_zrn26

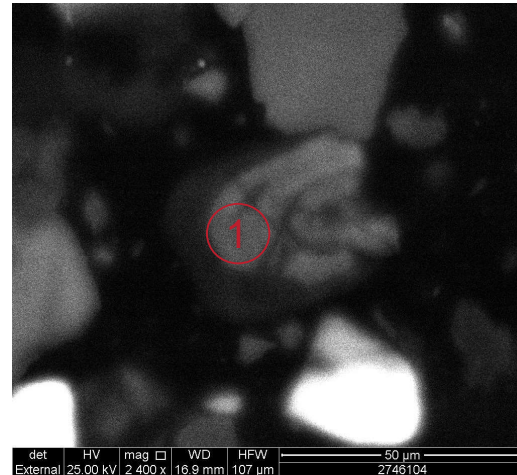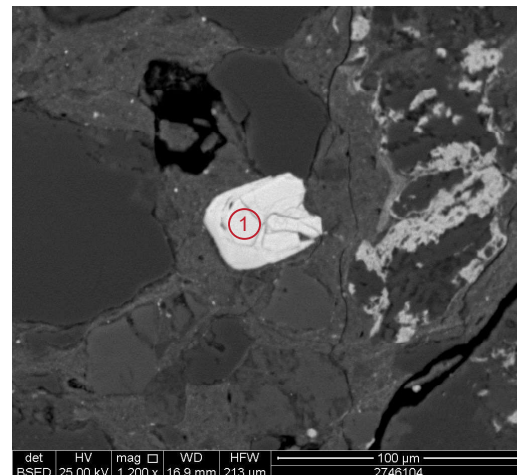



CAR010\_01\_zrn29

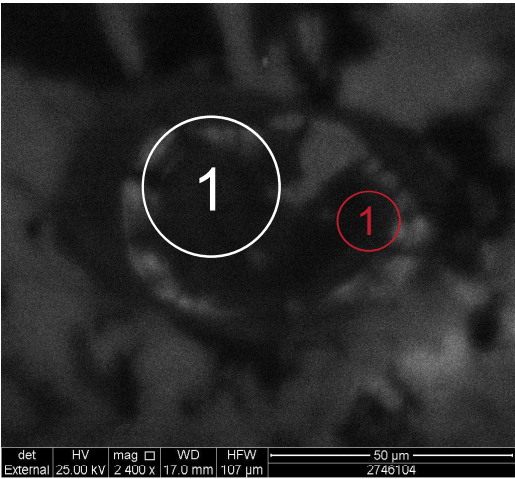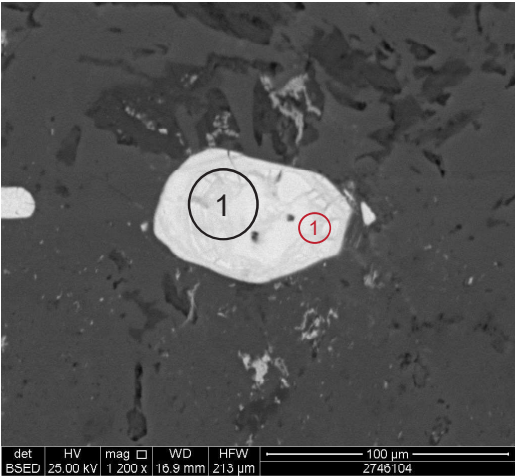

CAR010\_01\_zrn31

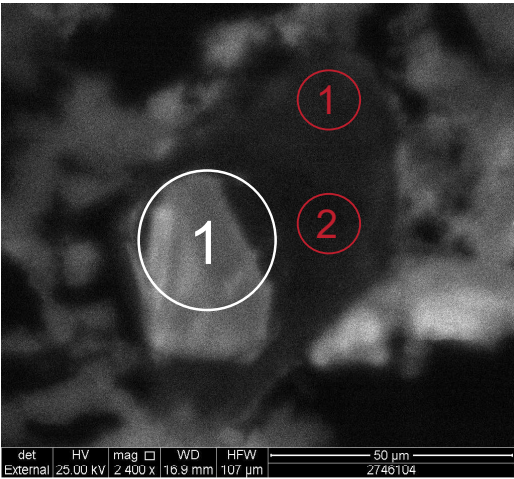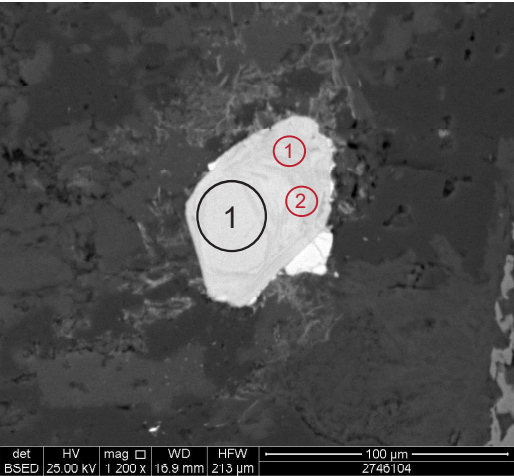

CAR010\_01\_zrn32

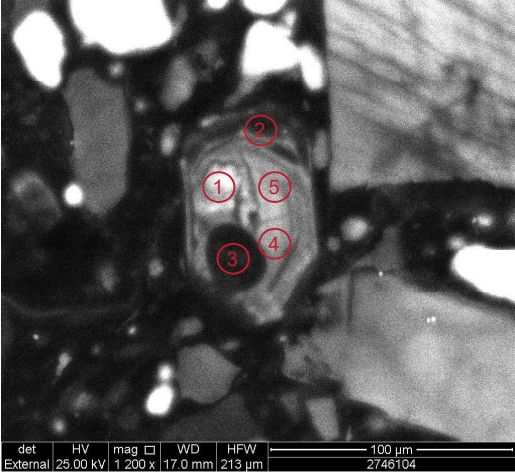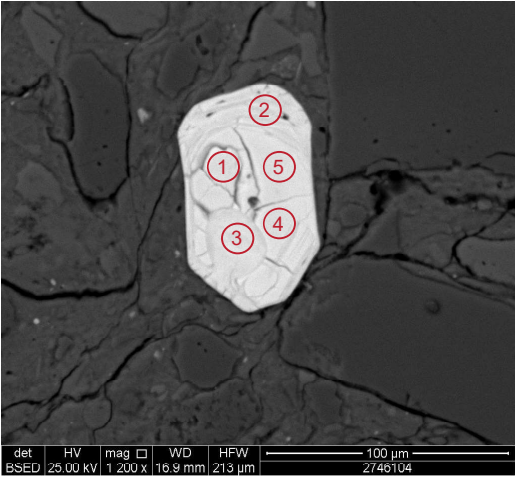

CAR010\_01\_zrn33

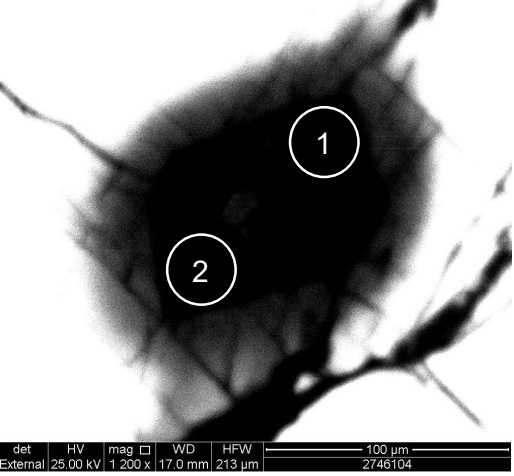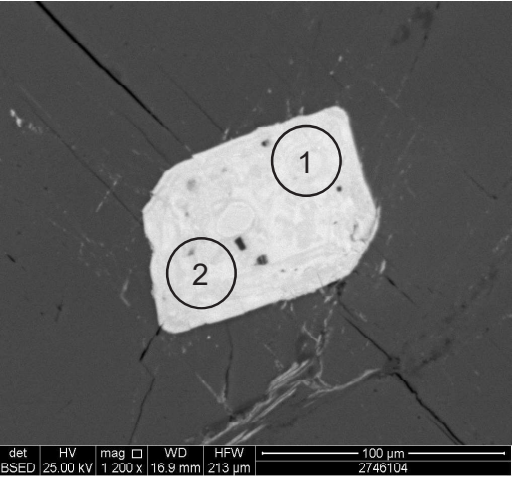



CAR010\_01\_zrn34

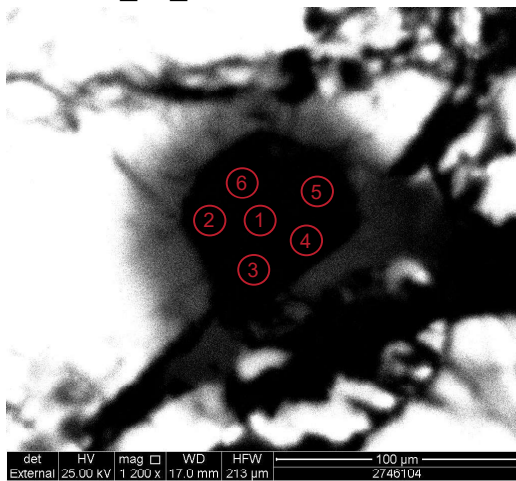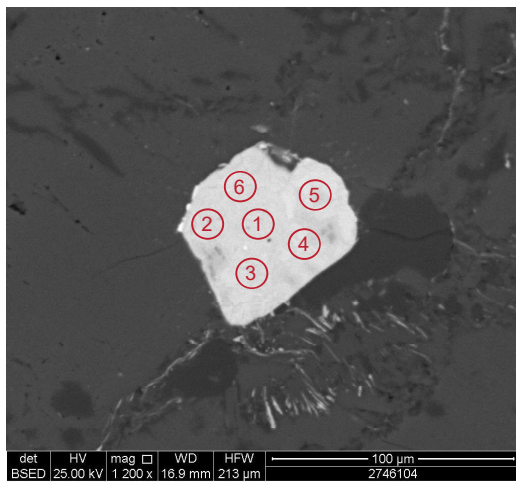

CAR010\_01\_zrn37

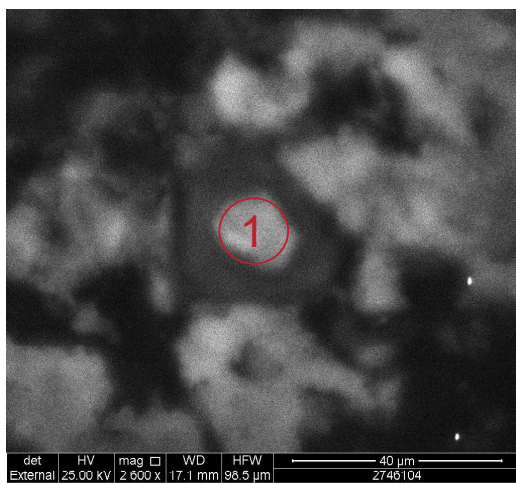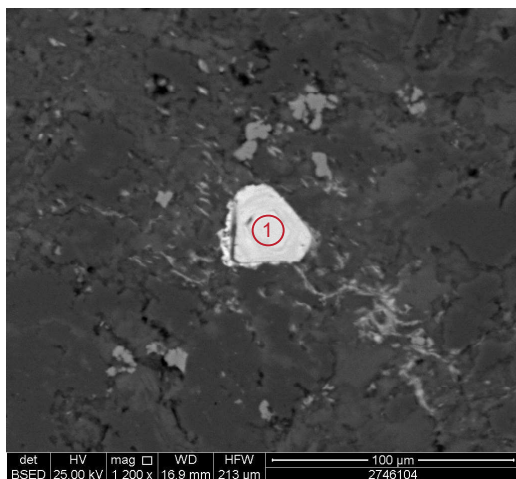

CAR010\_01\_zrn36

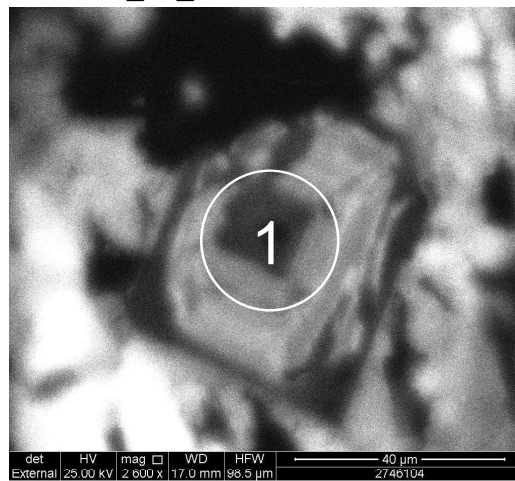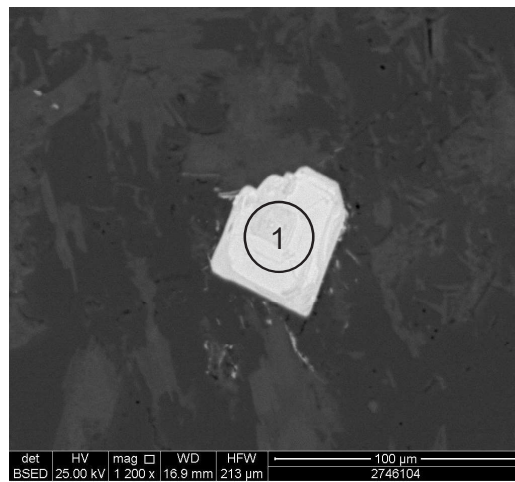

CAR010\_01\_zrn40

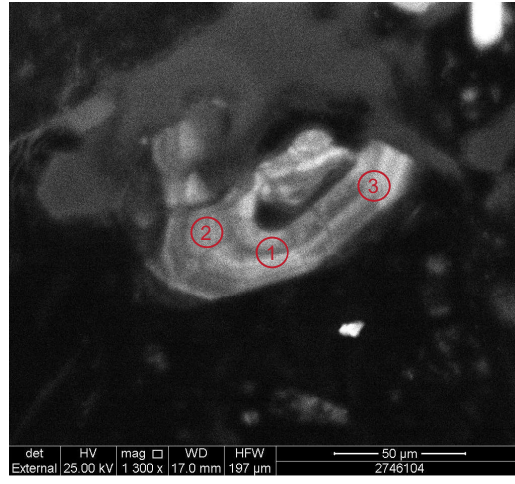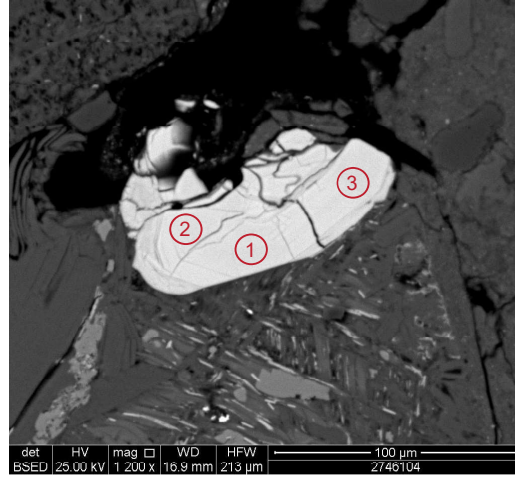

CAR010\_01\_zrn47

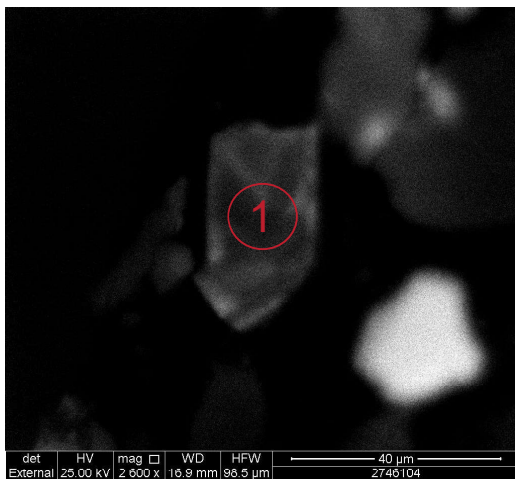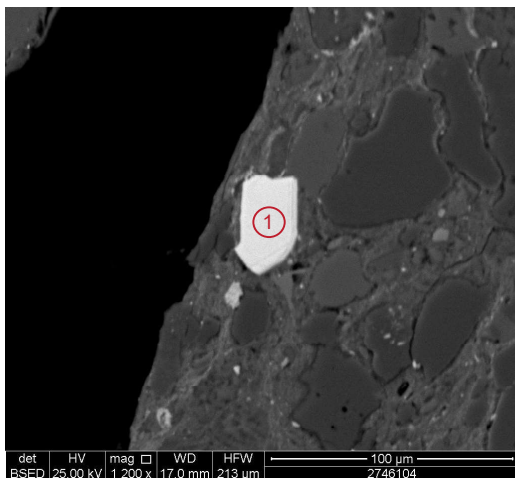

CAR010\_01\_zrn49

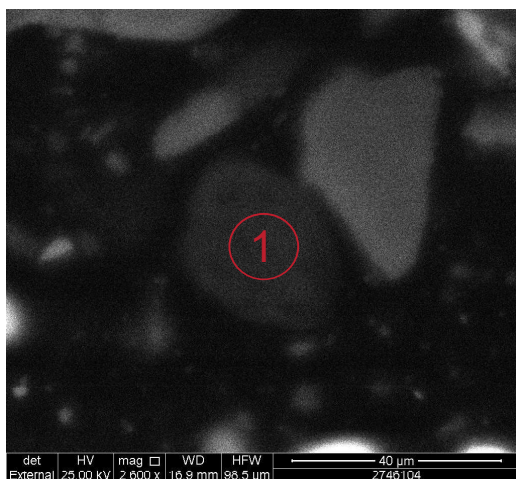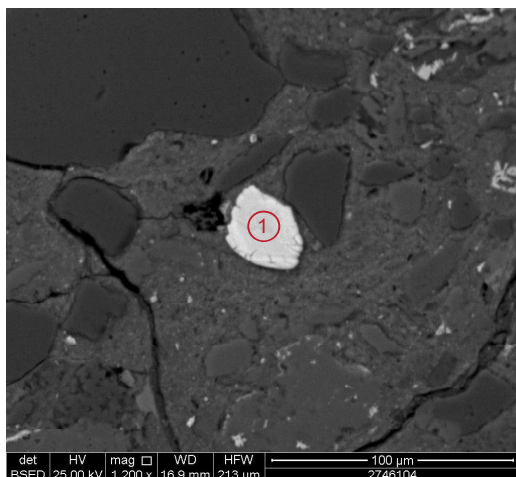

CAR010\_01\_zrn48

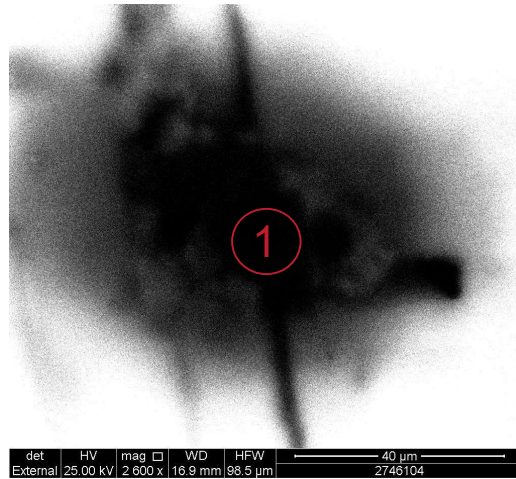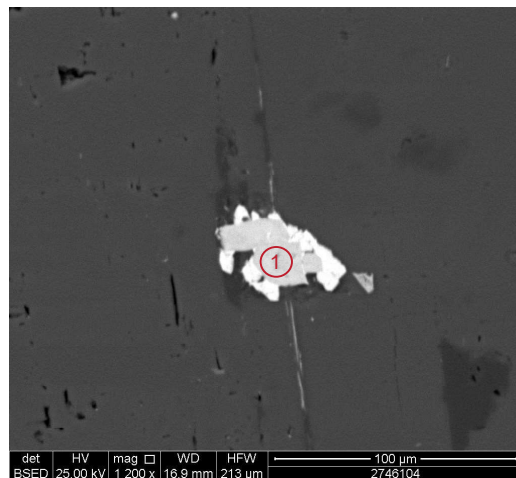

CAR010\_01\_zrn50

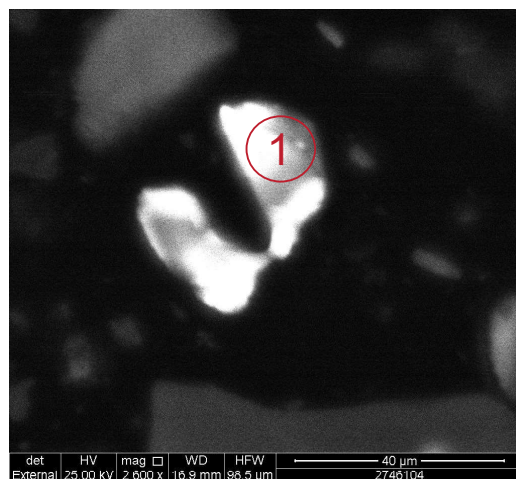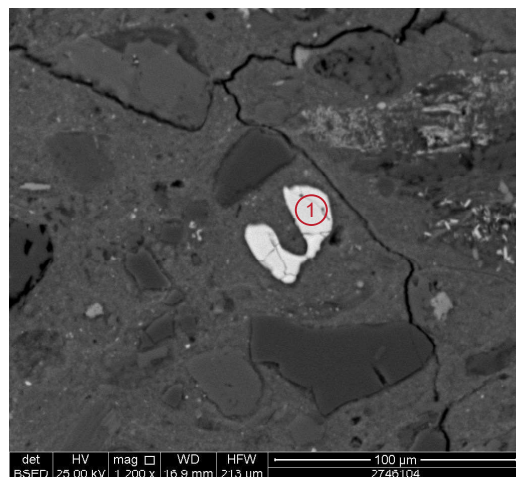



CAR034\_28\_zrn07

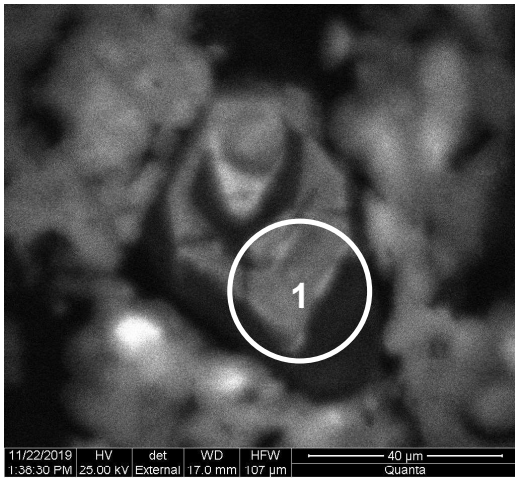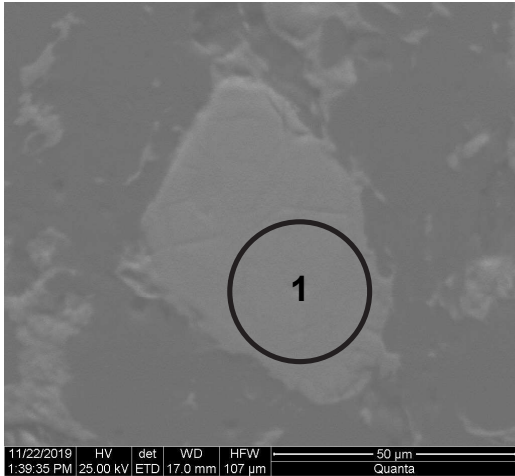

CAR034\_28\_zrn13

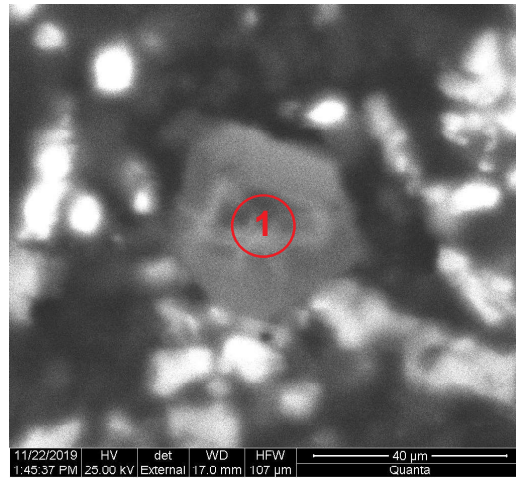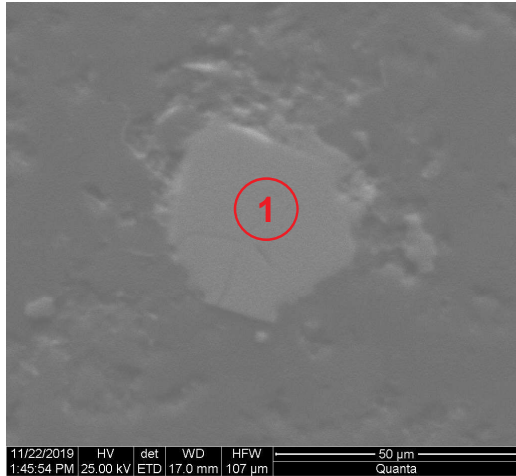

CAR034\_28\_zrn14a

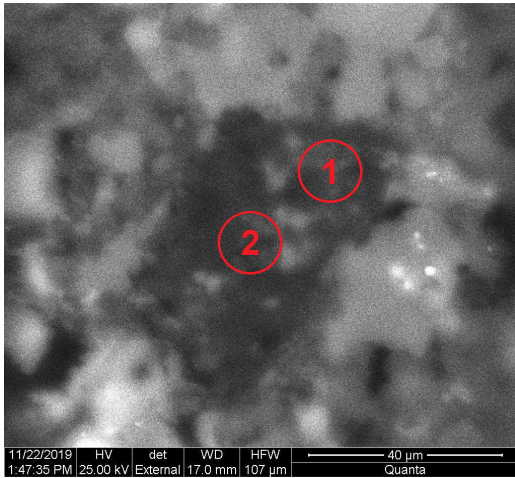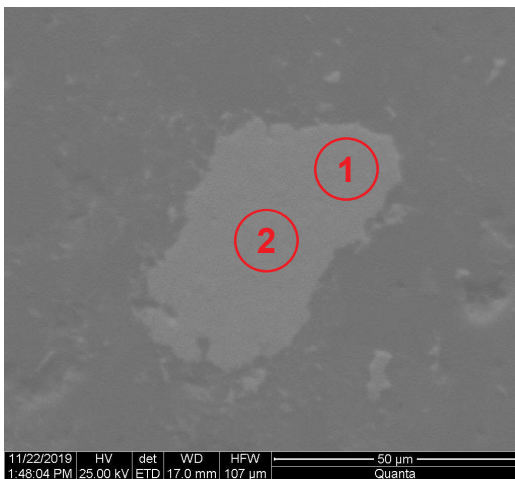

CAR034\_28\_zrn14b

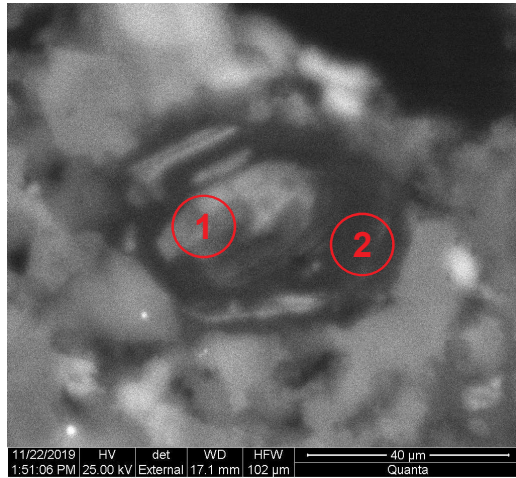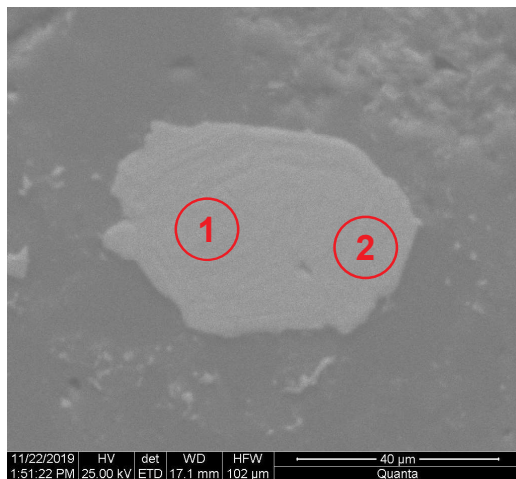

CAR034\_28\_zrn15

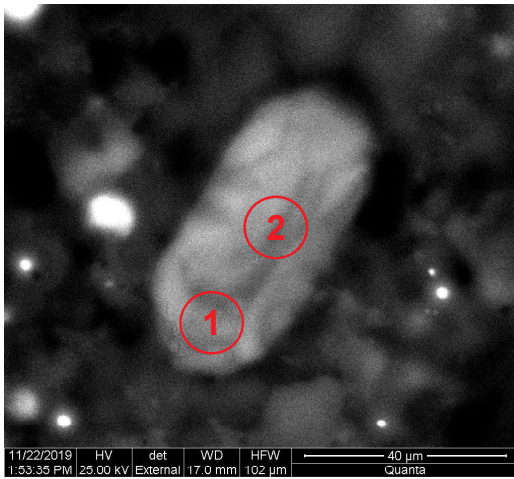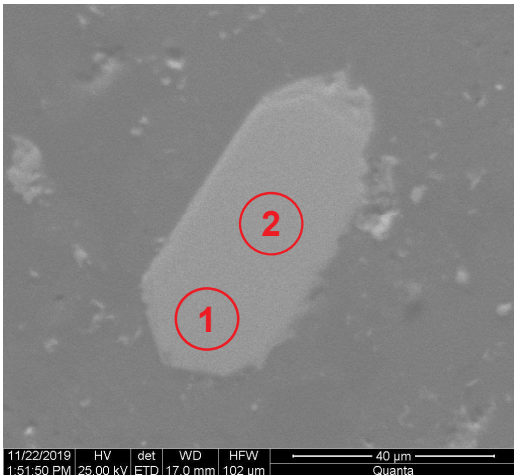

CAR034\_28\_zrn16

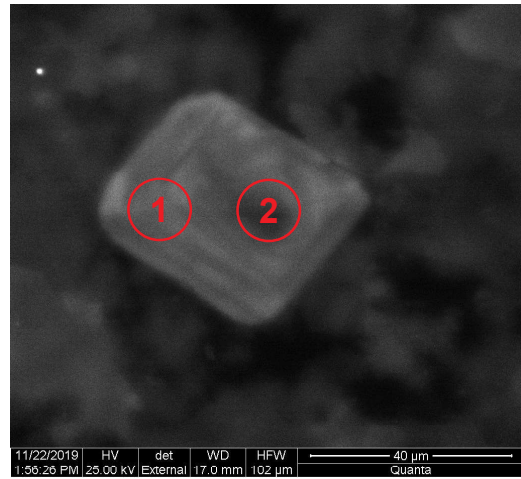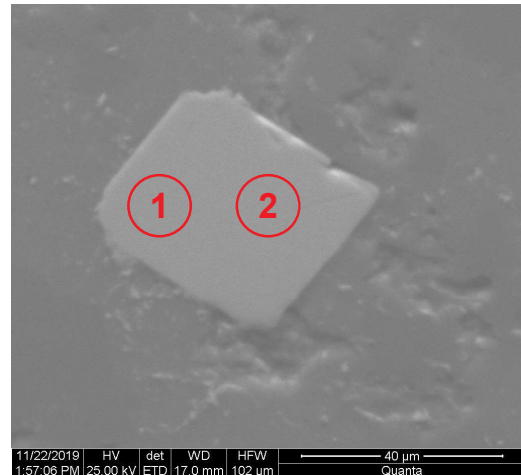

CAR034\_28\_zrn19

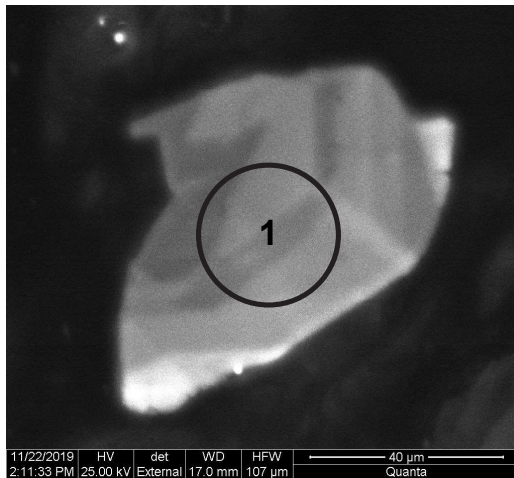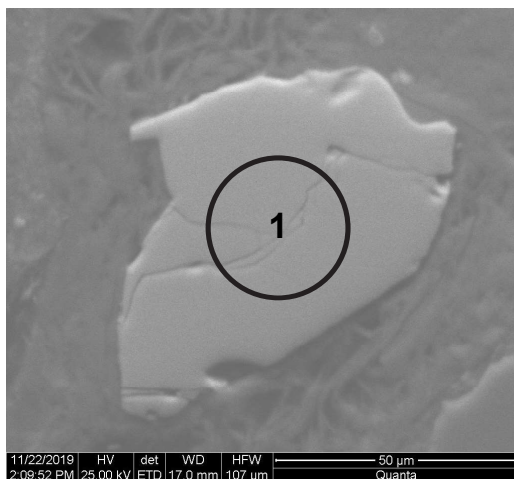

CAR034\_28\_zrn22

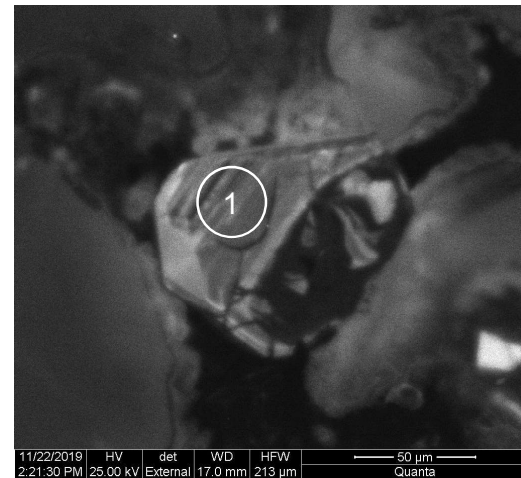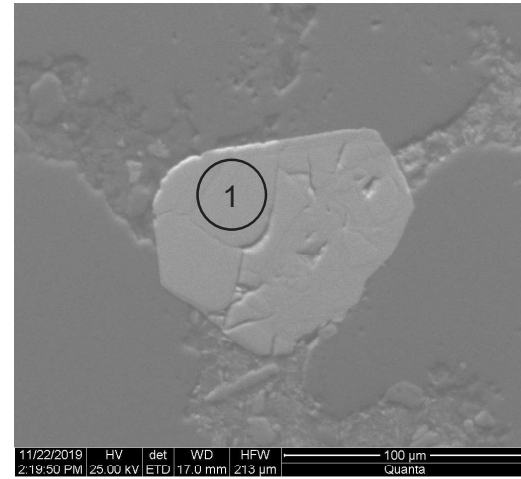



CAR034\_28\_zrn23

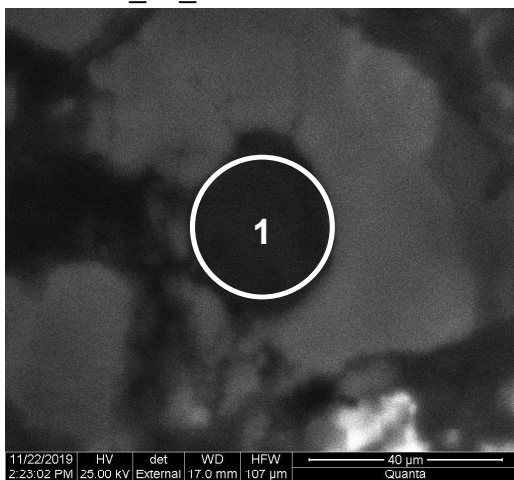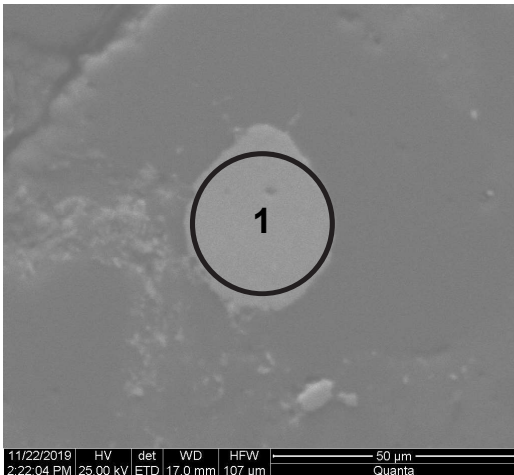

CAR034\_28\_zrn24a

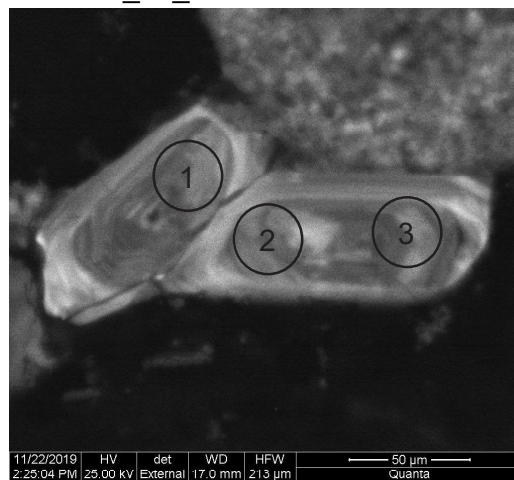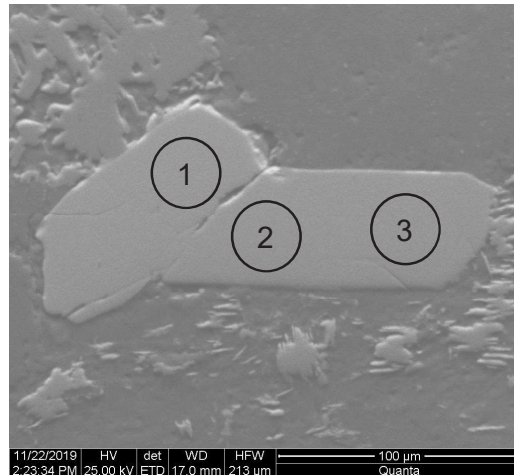

CAR034\_28\_zrn24b

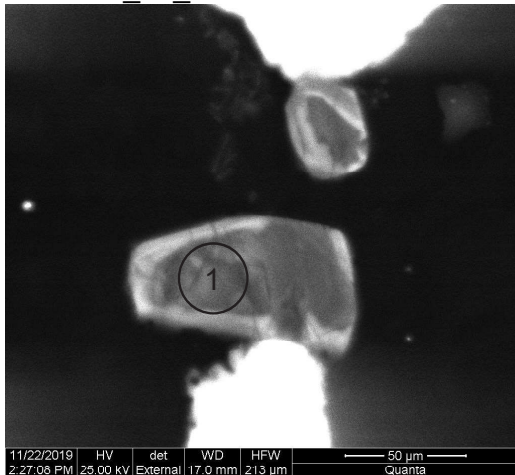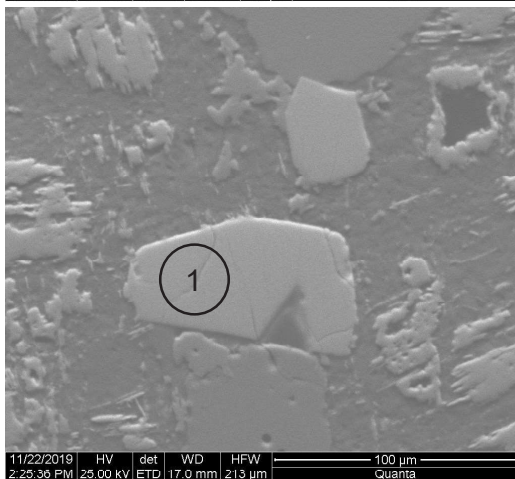

CAR034\_28\_zrn25

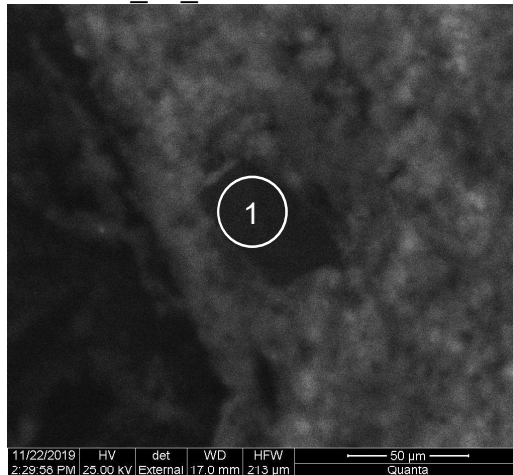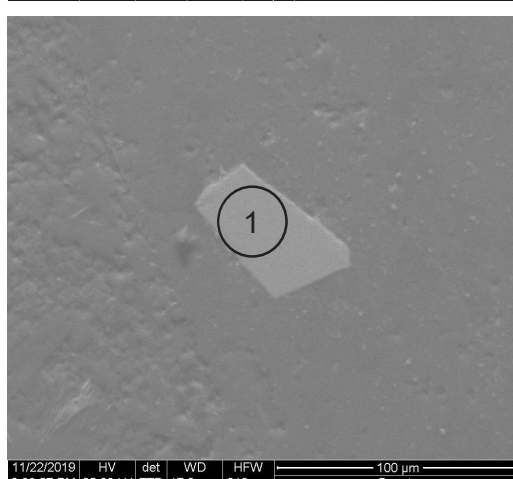

CAR034\_28\_zrn26

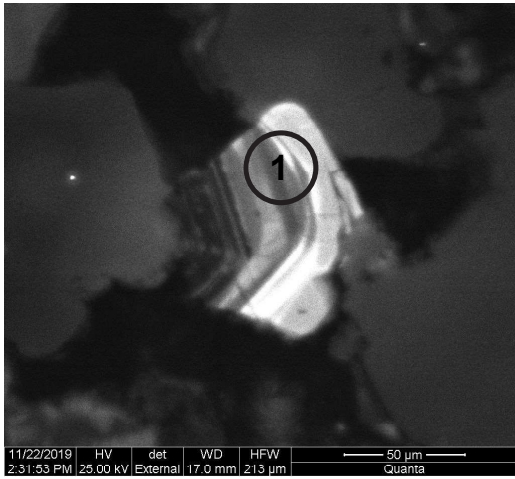

CAR034\_28\_zrn27

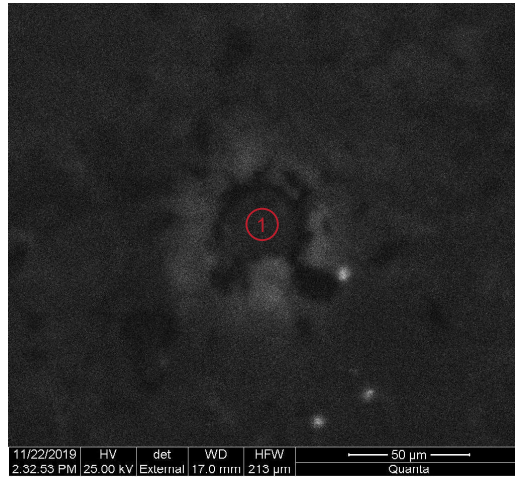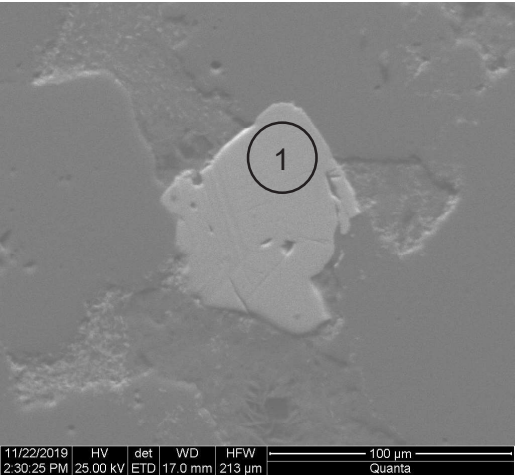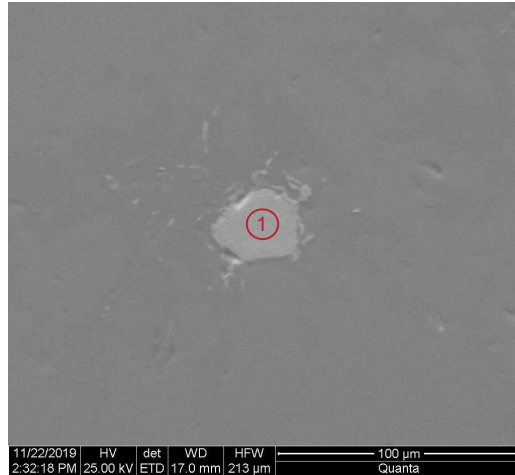

CAR034\_28\_zrn28

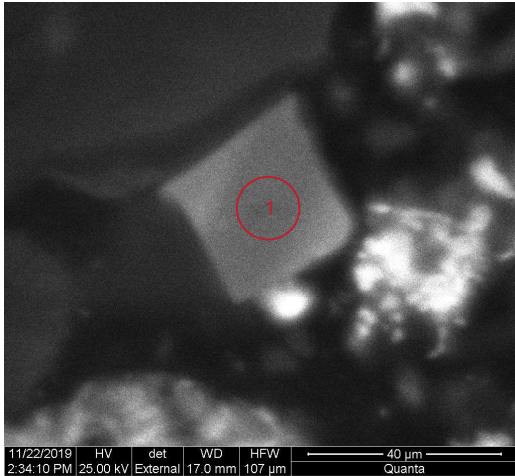

CAR034\_28\_zrn29

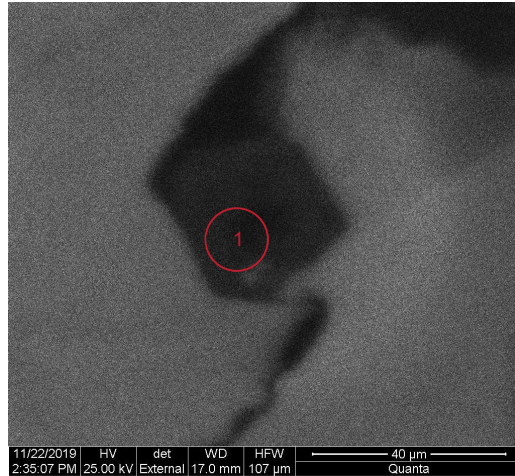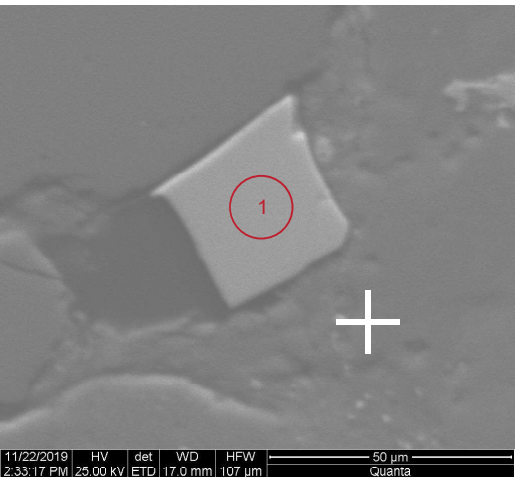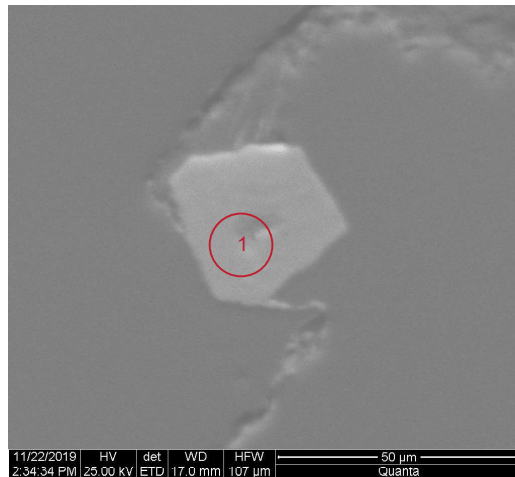



CAR034\_28\_zrn30

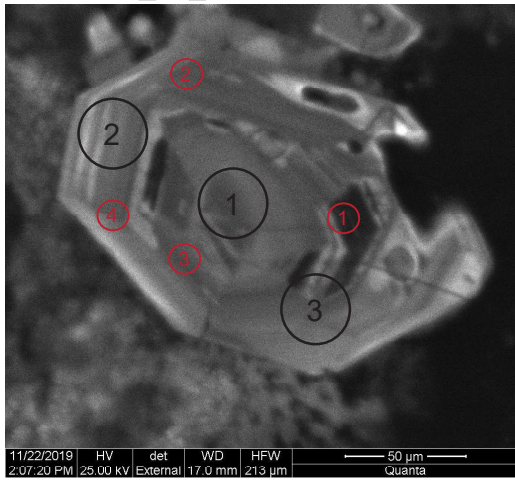

CAR034\_28\_zrn32

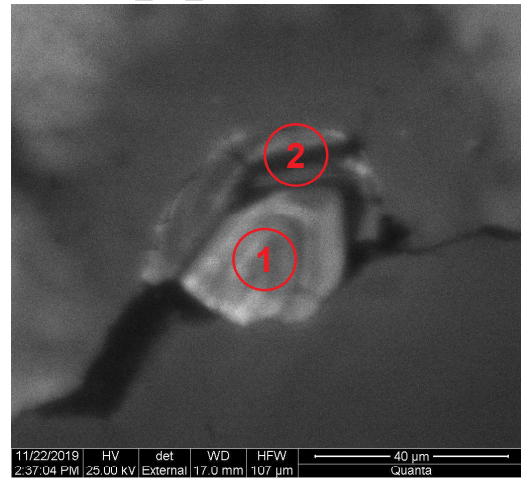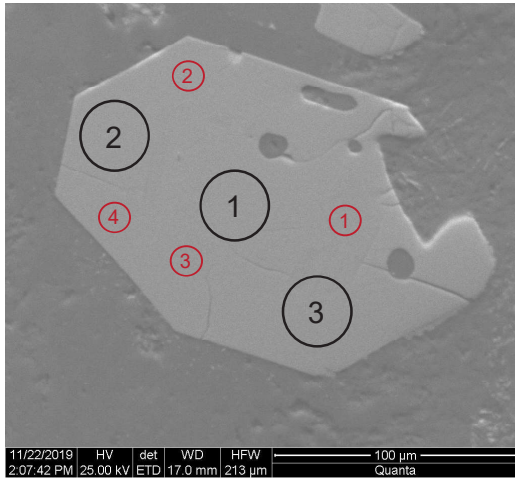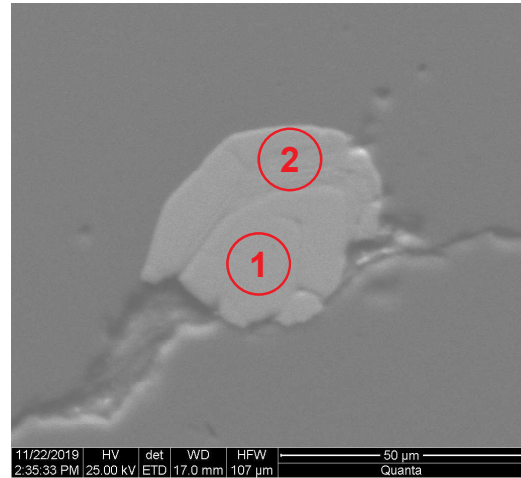

CAR034\_28\_zrn35

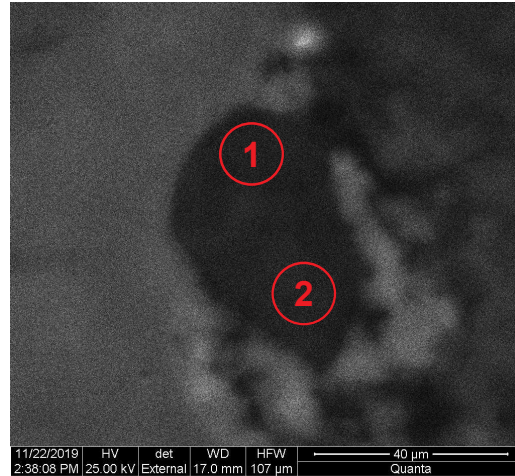

CAR034\_28\_zrn36

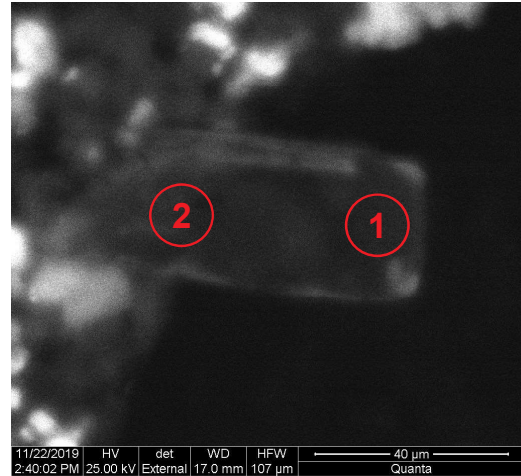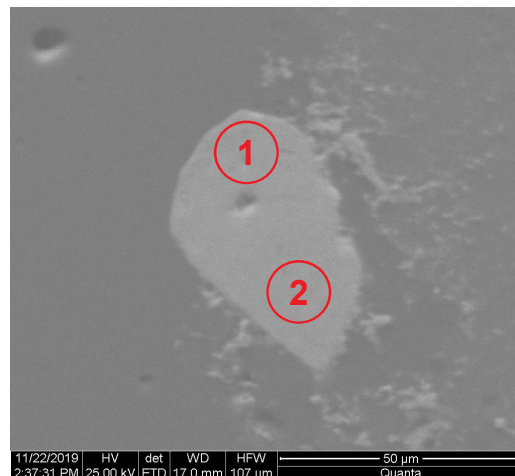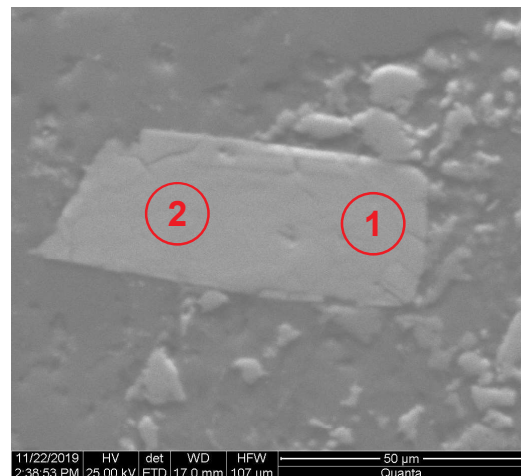

CAR034\_28\_zrn50

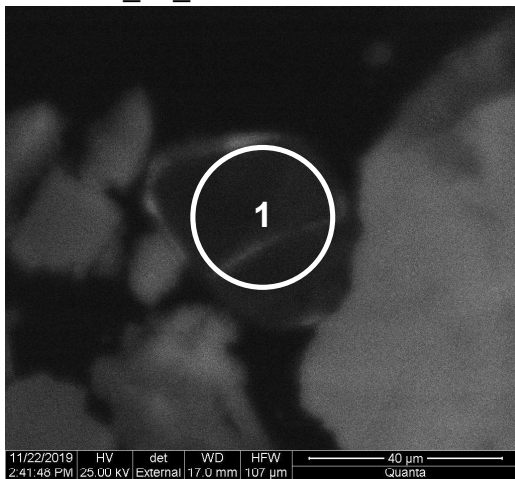

CAR034\_28\_zrn51

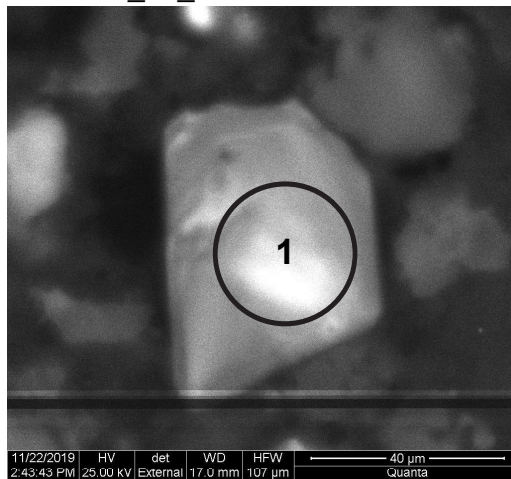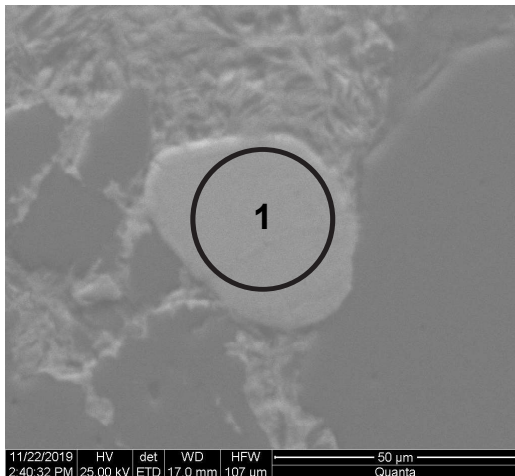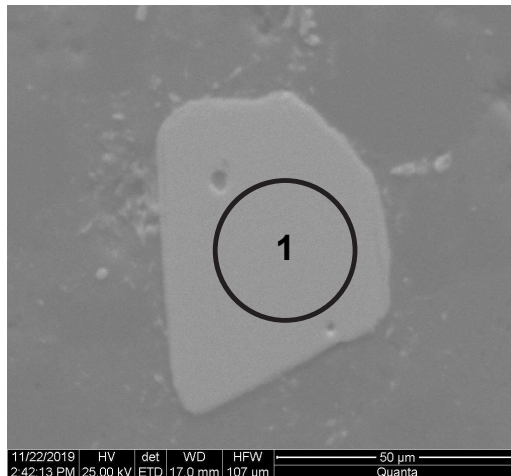



CAR019\_10\_zrn03

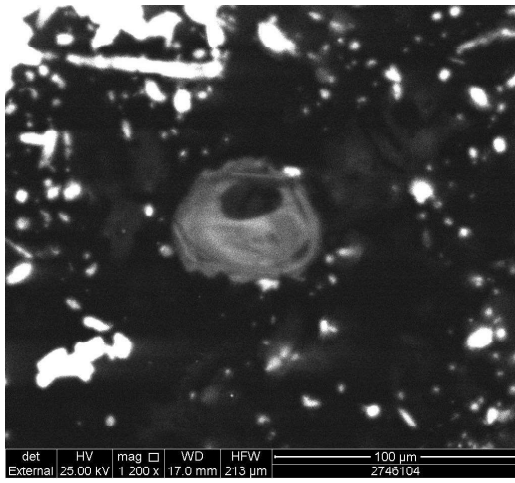

CAR019\_10\_zrn04

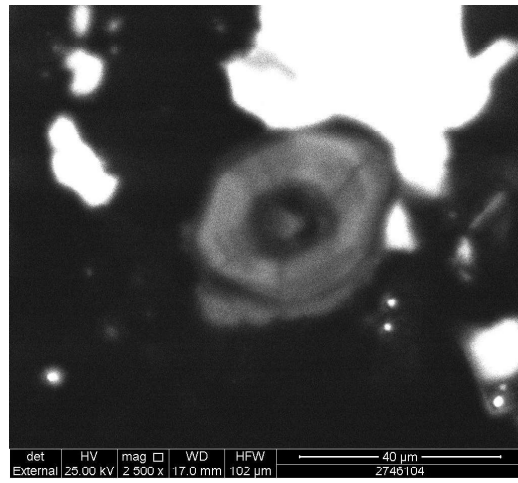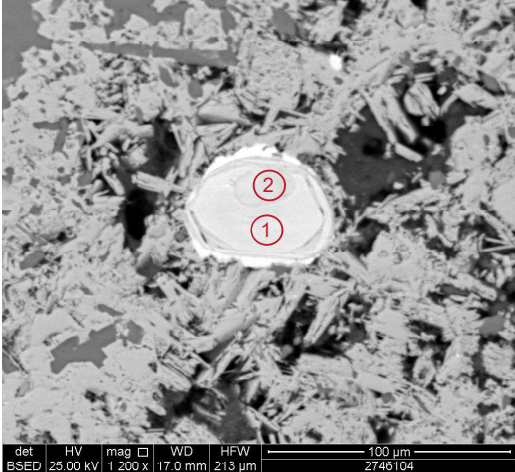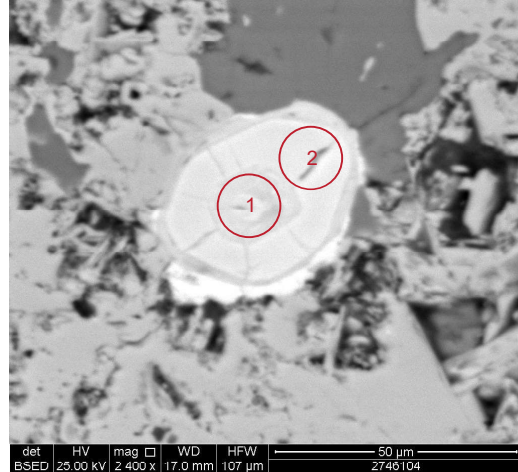

CAR019\_10\_zrn05

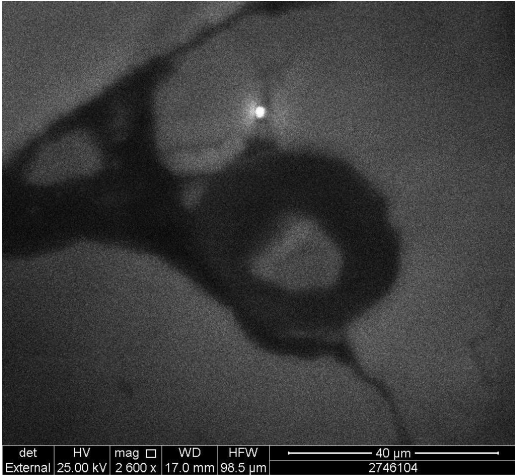

CAR019\_10\_zrn23

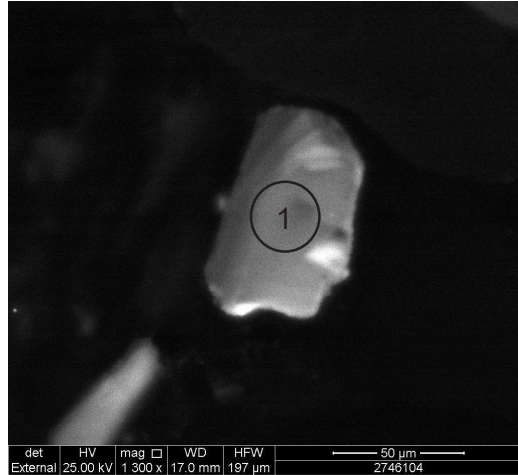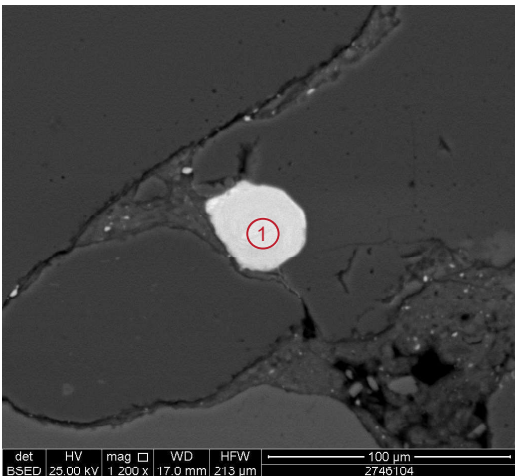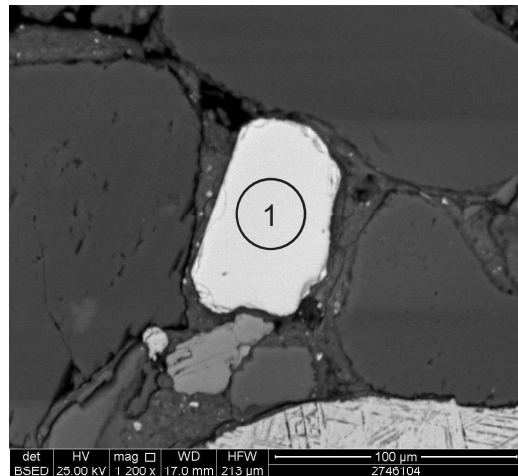



CAR019\_10\_zrn28

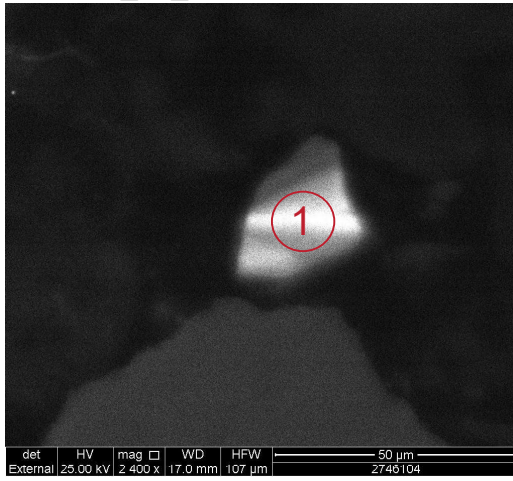

CAR019\_10\_zrn31

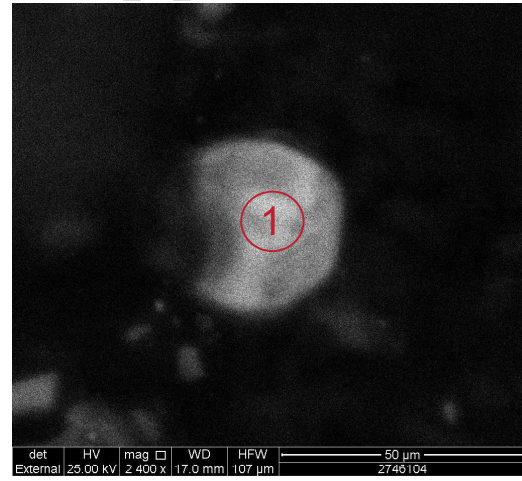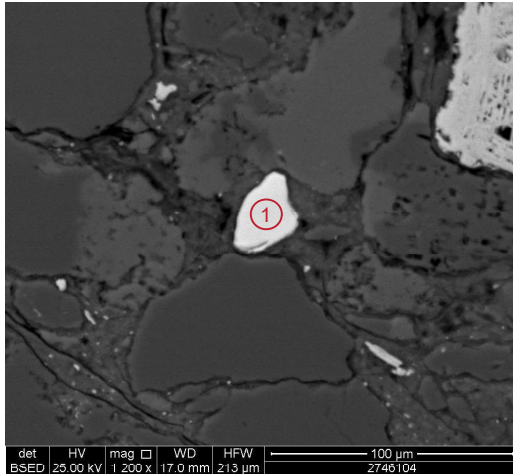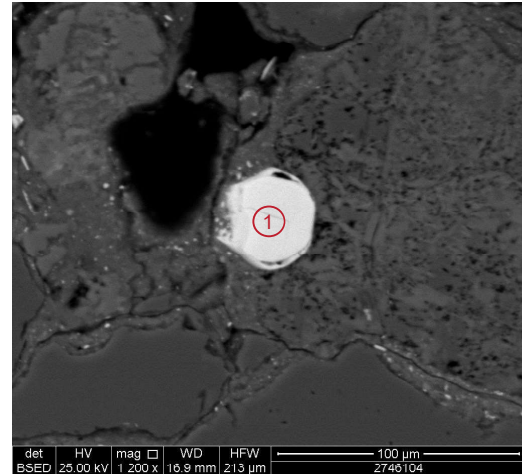

CAR019\_10\_zrn32

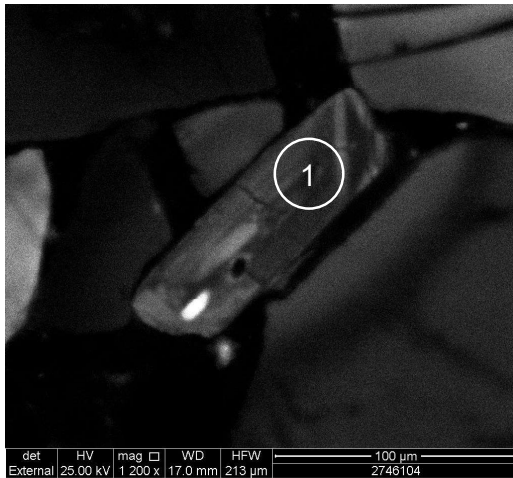

CAR019\_10\_zrn34

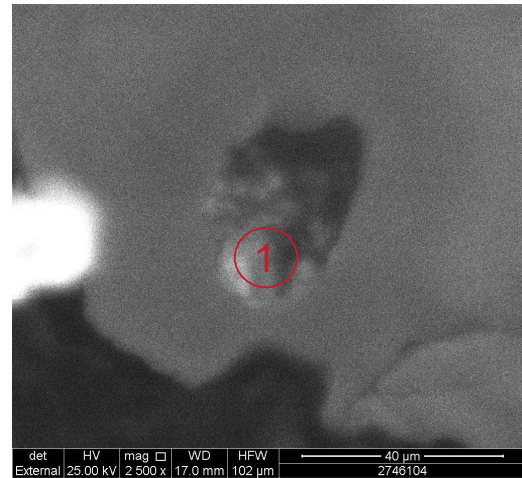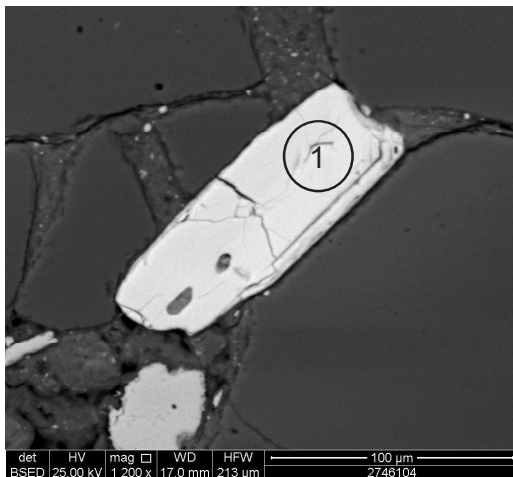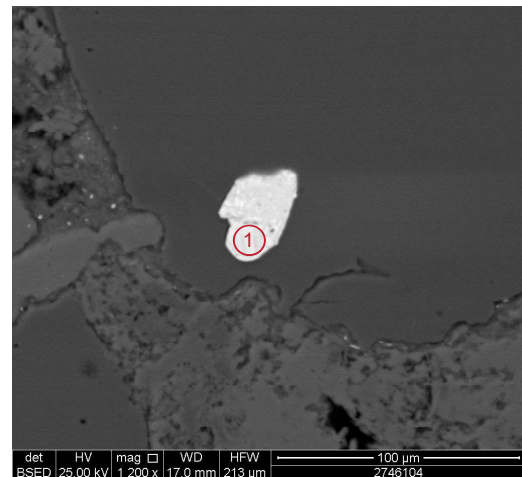



CAR019\_10\_zrn35

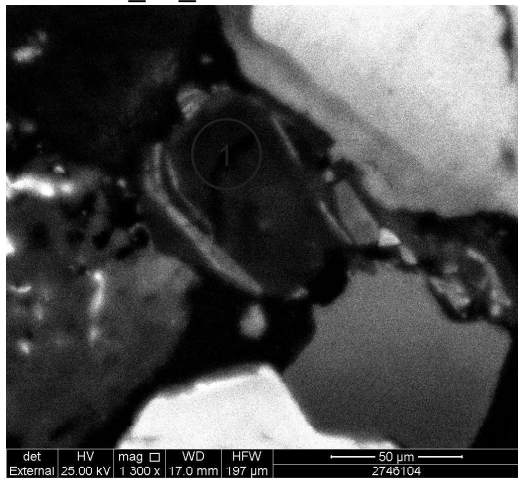

CAR019\_10\_zrn36

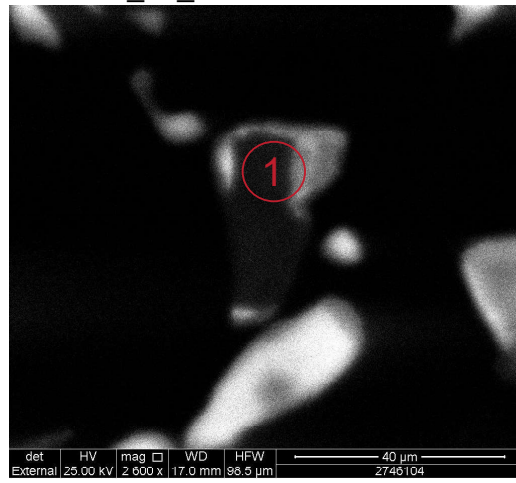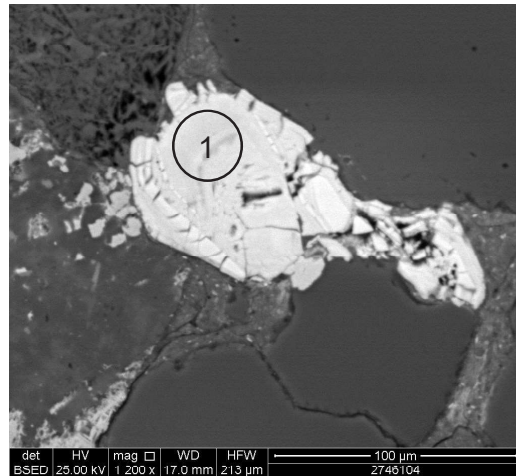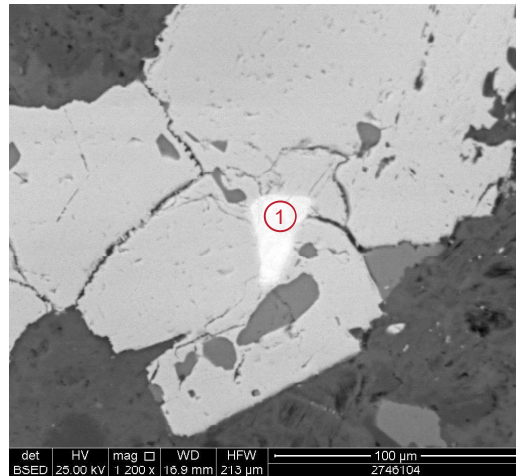

CAR019\_10\_zrn22

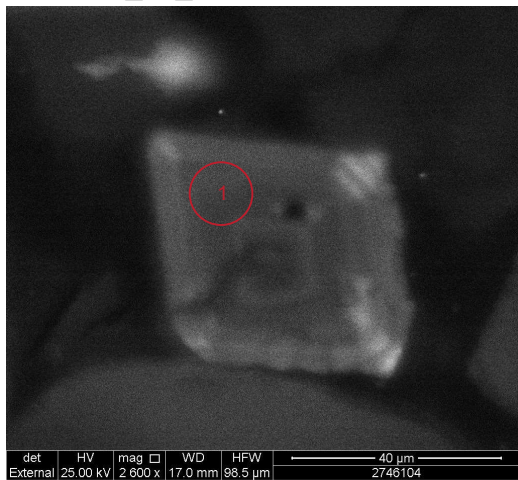

CAR019\_10\_zrn01

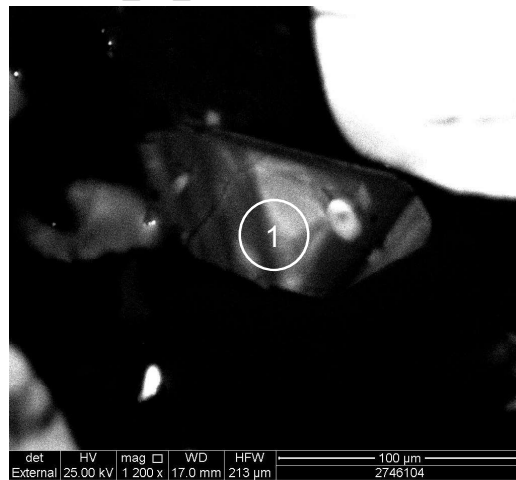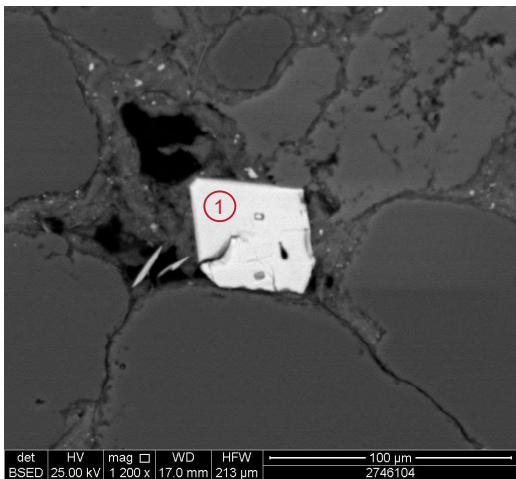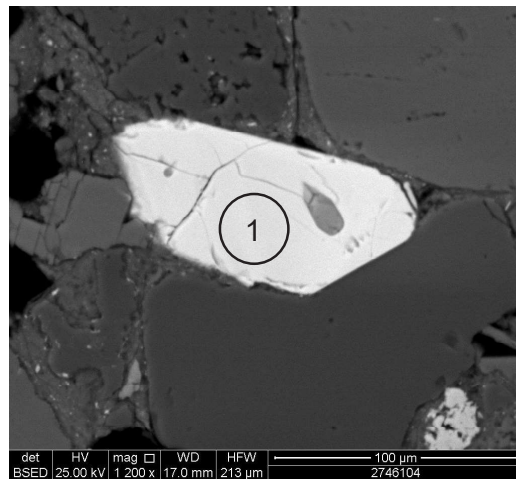

Supplement: s1 [file s1]
